# Supplementary material
Source: publisher site journal article supplement (https://www.dovepress.com/get_supplementary_file.php?f=483139.docx)
Supplement: Supplementary file 1 [file get_supplementary_file.php]

**Supplementary Material**

**Contents**

**Supplementary Tables**

**Table S1.** Details of SNPs selected as instrumental variables for exposure.........................................................................................................................................4

**Table S2.** Genetic association estimates for the causal effect of overall BC on CVD.........................................................................................................................7

**Table S3.** Genetic association estimates for the causal effect of ER+ BC on CVD............................................................................................................................10

**Table S4.** Genetic association estimates for the causal effect of ER- BC on CVD............................................................................................................................13

**Table S5.** Genetic association estimates for the causal effect of ER+ BC on potential mediators.....................................................................................................15

**Table S6.** Genetic association estimates for the causal effect of selected mediators (Fasting insulin) on CVD................................................................................29

**Table S7.** Genetic association estimates for the causal effect of selected mediators (Total cholesterol) on CVD............................................................................31

**Table S8.** Genetic association estimates for the causal effect of selected mediators (HDL cholesterol) on CVD.............................................................................33

**Table S9.** Genetic association estimates for the causal effect of selected mediators (LDL cholesterol) on CVD.............................................................................36

**Table S10.** Genetic association estimates for the causal effect of selected mediators (Isoleucine) on CVD.....................................................................................38

**Table S11.** Genetic association estimates for the causal effect of selected mediators (Phenylalanine) on CVD...............................................................................40

**Table S12.** Genetic association estimates for the causal effect of selected mediators (Alanine) on CVD.........................................................................................43

**Table S13.** Genetic association estimates for the causal effect of selected mediators (Glutamine) on CVD.....................................................................................45

**Table S14.** Multivariable MR estimates for the causal effect of Total cholesterol on CVD with adjustment for ER+ BC...............................................................47

**Table S15.** Multivariable MR estimates for the causal effect of HDL cholesterol on CVD with adjustment for ER+ BC...............................................................48

**Table S16.** Multivariable MR estimates for the causal effect of LDL cholesterol on CVD with adjustment for ER+ BC................................................................49

**Supplementary Figures**

**Figure S1**. Forrest plot of the causal effect of ER- BC on CVD........................................................................................................................................................50

**Figure S2.** Leave-one-out analysis for MR examining the effect of overall BC on CHD..................................................................................................................50

**Figure S3.** Scatter plot for MR examining the effect of overall BC on CHD.....................................................................................................................................51

**Figure S4** Funnel plot for MR examining the effect of overall BC on CHD......................................................................................................................................51

**Figure S5.** Leave-one-out analysis for MR examining the effect of overall BC on HHD..................................................................................................................52

**Figure S6.** Scatter plot for MR examining the effect of overall BC on HHD....................................................................................................................................52

**Figure S7.** Funnel plot for MR examining the effect of overall BC on HHD....................................................................................................................................53

**Figure S8.** Leave-one-out analysis for MR examining the effect of overall BC on IHD...................................................................................................................53

**Figure S9** Scatter plot for MR examining the effect of overall BC on IHD.......................................................................................................................................54

**Figure S10.** Funnel plot for MR examining the effect of overall BC on IHD....................................................................................................................................54

**Figure S11.** Leave-one-out analysis for MR examining the effect of overall BC on HF....................................................................................................................55

**Figure S12.** Scatter plot for MR examining the effect of overall BC on HF......................................................................................................................................55

**Figure S13.** Funnel plot for MR examining the effect of overall BC on HF......................................................................................................................................56

**Figure S14.** Leave-one-out analysis for MR examining the effect of ER+ BC on CHD...................................................................................................................56

**Figure S15.** Scatter plot for MR examining the effect of ER+ BC on CHD......................................................................................................................................57

**Figure S16.** Funnel plot for MR examining the effect of ER+ BC on CHD......................................................................................................................................57

**Figure S17.** Leave-one-out analysis for MR examining the effect of ER+ BC on HHD...................................................................................................................58

**Figure S18.** Scatter plot for MR examining the effect of ER+ BC on HHD......................................................................................................................................58

**Figure S19.** Funnel plot for MR examining the effect of ER+ BC on HHD......................................................................................................................................59

**Figure S20.** Leave-one-out analysis for MR examining the effect of ER+ BC on IHD.....................................................................................................................59

**Figure S21.** Scatter plot for MR examining the effect of ER+ BC on IHD........................................................................................................................................60

**Figure S22.** Funnel plot for MR examining the effect of ER+ BC on IHD........................................................................................................................................60

**Figure S23.** Leave-one-out analysis for MR examining the effect of ER+ BC on HF.......................................................................................................................61

**Figure S24.** Scatter plot for MR examining the effect of ER+ BC on HF..........................................................................................................................................61

**Figure S25.** Funnel plot for MR examining the effect of ER+ BC on HF..........................................................................................................................................62

**Figure S26.** Leave-one-out analysis for MR examining the effect of ER- BC on CHD....................................................................................................................62

**Figure S27.** Scatter plot for MR examining the effect of ER- BC on CHD.......................................................................................................................................63

**Figure S28.** Funnel plot for MR examining the effect of ER- BC on CHD.......................................................................................................................................63

**Figure S29.** Leave-one-out analysis for MR examining the effect of ER- BC on HHD....................................................................................................................64

**Figure S30.** Scatter plot for MR examining the effect of ER- BC on HHD.......................................................................................................................................64

**Figure S31.** Funnel plot for MR examining the effect of ER- BC on HHD.......................................................................................................................................65

**Figure S32.** Leave-one-out analysis for MR examining the effect of ER- BC on IHD......................................................................................................................65

**Figure S33.** Scatter plot for MR examining the effect of ER- BC on IHD.........................................................................................................................................66

**Figure S34.** Funnel plot for MR examining the effect of ER- BC on IHD.........................................................................................................................................66

**Figure S35.** Leave-one-out analysis for MR examining the effect of ER- BC on HF........................................................................................................................67

**Figure S36.** Scatter plot for MR examining the effect of ER- BC on HF...........................................................................................................................................67

**Figure S37.** Funnel plot for MR examining the effect of ER- BC on HF...........................................................................................................................................68

**STROBE-MR checklist**

STROBE-MR checklist of recommended items to address in reports of Mendelian randomization studies......................................................................................69

**Supplementary Tables**

**Table S1.** Details of SNPs selected as instrumental variables for exposure

| Exposure | SNP | effect allele | other allele | EAF | beta | se | p-value | F |
| --- | --- | --- | --- | --- | --- | --- | --- | --- |
| overall BC | | | | | | | | |
|  | rs10206829 | A | G | 0.5639 | -0.0899 | 0.0175 | 3.03E-07 | 12.98399158 |
|  | rs10243756 | C | T | 0.308 | -0.1071 | 0.0198 | 6.23E-08 | 12.47599935 |
|  | rs10419397 | A | G | 0.2955 | 0.0962 | 0.019 | 4.09E-07 | 10.67646191 |
|  | rs10483813 | A | T | 0.238 | -0.1427 | 0.0208 | 7.49E-12 | 17.07987457 |
|  | rs10941679 | G | A | 0.2633 | 0.1091 | 0.0201 | 5.93E-08 | 11.43286172 |
|  | rs10995181 | A | T | 0.1465 | -0.1615 | 0.0257 | 3.48E-10 | 9.877685969 |
|  | rs11599804 | A | G | 0.4087 | 0.2327 | 0.0178 | 7.28E-39 | 82.80829336 |
|  | rs117484257 | A | T | 0.0297 | -0.2988 | 0.0607 | 8.40E-07 | 1.396587712 |
|  | rs132289 | G | A | 0.9819 | -0.5564 | 0.0781 | 1.04E-12 | 1.804036776 |
|  | rs1910020 | C | T | 0.7179 | -0.1461 | 0.0193 | 3.39E-14 | 23.2255715 |
|  | rs1973765 | C | T | 0.3927 | -0.0943 | 0.0183 | 2.63E-07 | 12.66945532 |
|  | rs2353275 | C | T | 0.9194 | -0.1597 | 0.0321 | 6.36E-07 | 3.668526001 |
|  | rs3095602 | A | G | 0.2753 | 0.2281 | 0.0197 | 3.77E-31 | 53.57983096 |
|  | rs3769820 | C | T | 0.6205 | -0.096 | 0.018 | 9.13E-08 | 13.40088095 |
|  | rs487930 | A | C | 0.5267 | 0.1227 | 0.0175 | 2.27E-12 | 24.5269636 |
|  | rs548980 | T | C | 0.6274 | 0.0984 | 0.018 | 4.95E-08 | 13.97727722 |
|  | rs6001954 | G | T | 0.1076 | 0.1467 | 0.0277 | 1.23E-07 | 5.387009965 |
|  | rs6087546 | A | G | 0.2345 | 0.0978 | 0.021 | 3.05E-06 | 7.788153494 |
|  | rs6721996 | A | G | 0.499 | -0.1371 | 0.0173 | 2.42E-15 | 31.42997871 |
|  | rs6904031 | T | A | 0.068 | 0.1904 | 0.0368 | 2.30E-07 | 3.393217434 |
|  | rs7072776 | G | A | 0.7215 | -0.098 | 0.0211 | 3.47E-06 | 8.670974546 |
|  | rs719338 | T | G | 0.6131 | -0.107 | 0.0178 | 1.81E-09 | 17.1510226 |
|  | rs72658071 | T | A | 0.0866 | 0.1811 | 0.031 | 5.31E-09 | 5.399677698 |
|  | rs72745946 | T | G | 0.1167 | 0.1392 | 0.0283 | 8.97E-07 | 4.988323553 |
|  | rs757594 | A | G | 0.7529 | -0.0948 | 0.02 | 2.12E-06 | 8.361452481 |
|  | rs77283072 | A | G | 0.1661 | 0.1189 | 0.0234 | 3.88E-07 | 7.153432113 |
|  | rs77516568 | C | T | 0.0562 | 0.199 | 0.0384 | 2.19E-07 | 2.84905829 |
|  | rs7815316 | C | G | 0.3047 | 0.0907 | 0.0191 | 2.10E-06 | 9.557042062 |
|  | rs78540526 | T | C | 0.0727 | 0.3033 | 0.0331 | 5.74E-20 | 11.32395368 |
|  | rs7904519 | G | A | 0.4691 | 0.0801 | 0.0174 | 4.34E-06 | 10.55817956 |
|  | rs9361840 | G | A | 0.2318 | 0.0942 | 0.0206 | 4.79E-06 | 7.448312656 |
|  | rs9371545 | A | G | 0.0712 | 0.2775 | 0.0339 | 2.46E-16 | 8.864423556 |
|  | rs9693995 | T | C | 0.5572 | -0.1244 | 0.0176 | 1.39E-12 | 24.66987729 |
|  | rs9933302 | C | T | 0.2212 | 0.1303 | 0.0215 | 1.39E-09 | 12.65888317 |
| ER+ BC | | | | | | | | |
|  | rs10871546 | T | C | 0.0531 | -0.3521 | 0.0756 | 3.18E-06 | 2.181326636 |
|  | rs11695176 | T | C | 0.1548 | 0.1924 | 0.042 | 4.54E-06 | 5.492138926 |
|  | rs13387042 | G | A | 0.4796 | -0.1785 | 0.0304 | 4.17E-09 | 17.22180536 |
|  | rs139621388 | A | G | 0.0187 | 0.7949 | 0.1705 | 3.12E-06 | 0.797674467 |
|  | rs1397529 | C | A | 0.3002 | 0.1723 | 0.0333 | 2.30E-07 | 11.25332586 |
|  | rs147731832 | A | G | 0.0559 | -0.3721 | 0.0753 | 7.81E-07 | 2.577511943 |
|  | rs1527488 | C | T | 0.4023 | -0.1443 | 0.031 | 3.34E-06 | 10.42414016 |
|  | rs17136641 | A | G | 0.1484 | 0.2773 | 0.0427 | 8.73E-11 | 10.66389828 |
|  | rs1833448 | G | A | 0.4748 | -0.3345 | 0.0384 | 3.03E-18 | 37.90613331 |
|  | rs2072167 | C | T | 0.4006 | -0.1474 | 0.0314 | 2.67E-06 | 10.58678932 |
|  | rs2370941 | A | C | 0.5345 | 0.179 | 0.0306 | 4.82E-09 | 17.03962057 |
|  | rs2860197 | A | G | 0.589 | -0.3191 | 0.0312 | 1.54E-24 | 50.75760991 |
|  | rs3803661 | G | A | 0.7093 | -0.2511 | 0.033 | 2.62E-14 | 23.90046388 |
|  | rs3817522 | C | T | 0.1939 | 0.1813 | 0.0379 | 1.76E-06 | 7.155113629 |
|  | rs447383 | T | C | 0.2062 | -0.1855 | 0.0388 | 1.79E-06 | 7.484508831 |
|  | rs55878836 | G | C | 0.0566 | 0.4018 | 0.0658 | 1.00E-09 | 3.982445517 |
|  | rs594868 | A | G | 0.3967 | 0.1827 | 0.0311 | 4.36E-09 | 16.52993013 |
|  | rs62223704 | T | C | 0.0292 | 0.431 | 0.0879 | 9.49E-07 | 1.363034108 |
|  | rs6805189 | C | T | 0.4672 | -0.1406 | 0.0307 | 4.78E-06 | 10.44621739 |
|  | rs7168228 | T | A | 0.9363 | 0.381 | 0.0788 | 1.35E-06 | 2.788673496 |
|  | rs7244188 | C | G | 0.3348 | -0.1551 | 0.0327 | 2.07E-06 | 10.02433341 |
|  | rs72694214 | A | C | 0.0551 | -0.392 | 0.0855 | 4.54E-06 | 2.188825337 |
| ER- BC | | | | | | | | |
|  | rs10178188 | T | C | 0.0543 | 0.2774 | 0.0596 | 3.25E-06 | 2.224887387 |
|  | rs10243878 | A | T | 0.3022 | -0.1465 | 0.0313 | 2.88E-06 | 9.242394476 |
|  | rs117224821 | C | T | 0.0422 | 0.3379 | 0.0686 | 8.50E-07 | 1.961302897 |
|  | rs141292963 | C | A | 0.078 | 0.2487 | 0.0497 | 5.72E-07 | 3.601851766 |
|  | rs143469831 | A | G | 0.0149 | 0.8634 | 0.1472 | 4.43E-09 | 1.00991673 |
|  | rs1461919 | G | A | 0.4658 | 0.1261 | 0.0275 | 4.63E-06 | 10.46802537 |
|  | rs1863804 | C | G | 0.3731 | -0.1316 | 0.0286 | 4.14E-06 | 9.908064573 |
|  | rs28635560 | C | G | 0.1529 | 0.1879 | 0.0403 | 3.07E-06 | 5.632317237 |
|  | rs56115343 | C | T | 0.2703 | -0.1534 | 0.0313 | 9.34E-07 | 9.47828096 |
|  | rs6087546 | A | G | 0.2353 | 0.1541 | 0.0325 | 2.17E-06 | 8.092849391 |
|  | rs6904031 | T | A | 0.0656 | 0.2633 | 0.0573 | 4.37E-06 | 2.58863443 |
|  | rs71606856 | T | G | 0.0154 | 0.7577 | 0.157 | 1.39E-06 | 0.706285608 |
|  | rs72887136 | C | T | 0.0234 | 0.5462 | 0.1152 | 2.12E-06 | 1.027405451 |
|  | rs7508638 | A | T | 0.1773 | 0.1908 | 0.0352 | 6.01E-08 | 8.573951002 |
|  | rs77669267 | C | G | 0.0358 | 0.3468 | 0.0749 | 3.66E-06 | 1.480009347 |
|  | rs930735 | G | A | 0.4708 | -0.1421 | 0.0309 | 4.11E-06 | 10.54206176 |
|  | rs9371545 | A | G | 0.073 | 0.3007 | 0.0517 | 6.02E-09 | 4.578983841 |

EAF: Effect allele frequency

**Table S2.** Genetic association estimates for the causal effect of overall BC on CVD

| CHD | **MR analyses** | | | | | | | |
| --- | --- | --- | --- | --- | --- | --- | --- | --- |
| method | nsnp | b | se | p-value | or | or_lci95 | or_uci95 |
| MR Egger | 34 | 0.10489511 | 0.050251695 | 0.044900481 | 1.110594114 | 1.006422324 | 1.225548418 |
| Weighted median | 34 | 0.027327053 | 0.028092938 | 0.330683799 | 1.027703861 | 0.972645982 | 1.085878363 |
| Inverse variance weighted | 34 | 0.004988982 | 0.021098896 | 0.813078073 | 1.005001447 | 0.964288404 | 1.047433429 |
| Simple mode | 34 | 0.009008393 | 0.044202376 | 0.839762293 | 1.009049091 | 0.925308333 | 1.100368419 |
| Weighted mode | 34 | 0.029995728 | 0.033106671 | 0.371486708 | 1.030450132 | 0.965708406 | 1.099532187 |
| **Cochran Q test** | | | | | | | |
| method | Q | Q_df | Q_p-value |  |  |  |  |
| MR Egger | 34.95699101 | 32 | 0.329370966 |  |  |  |  |
| Inverse variance weighted | 40.0882727 | 33 | 0.184682447 |  |  |  |  |
| **MR-Egger regression analysis** |  |  |  |  |  |  |  |
| egger_intercept | se | p-value |  |  |  |  |  |
| -0.015553144 | 0.007176245 | 0.037761497 |  |  |  |  |  |
| **MR PRESSO** | | | | | | | |
| Global Test p-value |  |  |  |  |  |  |  |
| 0.18 |  |  |  |  |  |  |  |
| HHD | **MR analyses** | | | | | | | |
| method | nsnp | b | se | p-value | or | or_lci95 | or_uci95 |
| MR Egger | 34 | -0.030794912 | 0.099518657 | 0.758993933 | 0.969674421 | 0.797836587 | 1.178522642 |
| Weighted median | 34 | 0.019613282 | 0.054230187 | 0.717600711 | 1.019806886 | 0.916972419 | 1.134173792 |
| Inverse variance weighted | 34 | -0.000505042 | 0.039145854 | 0.989706341 | 0.999495085 | 0.925676077 | 1.079200869 |
| Simple mode | 34 | 0.046250617 | 0.100131387 | 0.647184264 | 1.047336858 | 0.860702036 | 1.274441618 |
| Weighted mode | 34 | 0.027692496 | 0.072222429 | 0.70385758 | 1.028079497 | 0.892379788 | 1.184414378 |
| **Cochran Q test** | | | | | | | |
| method | Q | Q_df | Q_p-value |  |  |  |  |
| MR Egger | 40.76182181 | 32 | 0.137763665 |  |  |  |  |
| Inverse variance weighted | 40.90213561 | 33 | 0.162306865 |  |  |  |  |
| **MR-Egger regression analysis** | | | | | | | |
| egger_intercept | se | p-value |  |  |  |  |  |
| 0.004722281 | 0.014228315 | 0.742133981 |  |  |  |  |  |
| **MR PRESSO** | | | | | | | |
| Global Test p-value |  |  |  |  |  |  |  |
| 0.156 |  |  |  |  |  |  |  |
| IHD | **MR analyses** | | | | | | | |
| method | nsnp | b | se | p-value | or | or_lci95 | or_uci95 |
| MR Egger | 34 | 0.059345643 | 0.054869223 | 0.287521398 | 1.061141954 | 0.952945053 | 1.181623477 |
| Weighted median | 34 | 0.028482603 | 0.023502852 | 0.225558876 | 1.028892111 | 0.982570691 | 1.077397266 |
| Inverse variance weighted | 34 | 0.007670422 | 0.02184989 | 0.725550217 | 1.007699915 | 0.965455409 | 1.051792873 |
| Simple mode | 34 | 0.005448928 | 0.037020286 | 0.883879503 | 1.005463801 | 0.935091558 | 1.081132052 |
| Weighted mode | 34 | 0.028141623 | 0.029219852 | 0.342502367 | 1.028541339 | 0.971290881 | 1.089166292 |
| **Cochran Q test** | | | | | | | |
| method | Q | Q_df | Q_p-value |  |  |  |  |
| MR Egger | 57.46662994 | 32 | 0.003753089 |  |  |  |  |
| Inverse variance weighted | 59.35908409 | 33 | 0.003257813 |  |  |  |  |
| **MR-Egger regression analysis** | | | | | | | |
| egger_intercept | se | p-value |  |  |  |  |  |
| -0.008045356 | 0.007837282 | 0.312330392 |  |  |  |  |  |
| **MR PRESSO** | | | | | | | |
| Global Test p-value |  |  |  |  |  |  |  |
| 0.518 |  |  |  |  |  |  |  |
| HF | **MR analyses** | | | | | | | |
| method | nsnp | b | se | p-value | or | or_lci95 | or_uci95 |
| MR Egger | 34 | 0.020128978 | 0.062416832 | 0.749177049 | 1.020332932 | 0.902841729 | 1.153113839 |
| Weighted median | 34 | 0.027126901 | 0.032424194 | 0.402803223 | 1.027498185 | 0.964230872 | 1.094916738 |
| Inverse variance weighted | 34 | -0.011706476 | 0.024579788 | 0.633886086 | 0.988361778 | 0.941874857 | 1.037143095 |
| Simple mode | 34 | -0.072761138 | 0.073615355 | 0.33015076 | 0.929822903 | 0.804891951 | 1.074144958 |
| Weighted mode | 34 | 0.045887827 | 0.049584407 | 0.361451182 | 1.046956964 | 0.9499959 | 1.153814332 |
| **Cochran Q test** | | | | | | | |
| method | Q | Q_df | Q_p-value |  |  |  |  |
| MR Egger | 43.64531967 | 32 | 0.082217681 |  |  |  |  |
| Inverse variance weighted | 44.06691724 | 33 | 0.094371206 |  |  |  |  |
| **MR-Egger regression analysis** | | | | | | | |
| egger_intercept | se | p-value |  |  |  |  |  |
| -0.004958623 | 0.008918788 | 0.582094951 |  |  |  |  |  |
| **MR PRESSO** | | | | | | | |
| Global Test p-value |  |  |  |  |  |  |  |
| 0.09 |  |  |  |  |  |  |  |

**Table S3.** Genetic association estimates for the causal effect of ER+ BC on CVD

| CHD | **MR analyses** | | | | | | | |
| --- | --- | --- | --- | --- | --- | --- | --- | --- |
| method | nsnp | b | se | p-value | or | or_lci95 | or_uci95 |
| MR Egger | 22 | 0.027413572 | 0.043314728 | 0.533974017 | 1.027792781 | 0.944137661 | 1.118860145 |
| Weighted median | 22 | 0.022891211 | 0.021800662 | 0.293707243 | 1.023155225 | 0.980357393 | 1.067821412 |
| Inverse variance weighted | 22 | 0.033269512 | 0.01494385 | 0.02599401 | 1.033829131 | 1.003987495 | 1.064557753 |
| Simple mode | 22 | 0.05362288 | 0.040823754 | 0.203178045 | 1.055086633 | 0.973953539 | 1.142978343 |
| Weighted mode | 22 | 0.026382287 | 0.027828867 | 0.353902619 | 1.026733381 | 0.972230568 | 1.084291596 |
| **Cochran Q test** | | | | | | | |
| method | Q | Q_df | Q_p-value |  |  |  |  |
| MR Egger | 20.94559919 | 20 | 0.400340816 |  |  |  |  |
| Inverse variance weighted | 20.96746706 | 21 | 0.460932581 |  |  |  |  |
| **MR-Egger regression analysis** | | | | | | | |
| egger_intercept | se | p-value |  |  |  |  |  |
| 0.001452509 | 0.010051874 | 0.886550817 |  |  |  |  |  |
| **MR PRESSO** | | | | | | | |
| Global Test p-value |  |  |  |  |  |  |  |
| 0.476 |  |  |  |  |  |  |  |
| HHD | **MR analyses** | | | | | | | |
| method | nsnp | b | se | p-value | or | or_lci95 | or_uci95 |
| MR Egger | 22 | -0.035080437 | 0.081456939 | 0.67131944 | 0.965527749 | 0.823051885 | 1.132667152 |
| Weighted median | 22 | 0.047970917 | 0.039480312 | 0.224343506 | 1.049140143 | 0.971017785 | 1.133547765 |
| Inverse variance weighted | 22 | 0.059606031 | 0.029175809 | 0.04105294 | 1.061418298 | 1.002424378 | 1.123884083 |
| Simple mode | 22 | 0.058445884 | 0.068543142 | 0.40345328 | 1.060187611 | 0.926910122 | 1.21262865 |
| Weighted mode | 22 | 0.02790947 | 0.052970103 | 0.603791152 | 1.028302588 | 0.926897832 | 1.140801257 |
| **Cochran Q test** | | | | | | | |
| method | Q | Q_df | Q_p-value |  |  |  |  |
| MR Egger | 22.00413604 | 20 | 0.340286252 |  |  |  |  |
| Inverse variance weighted | 23.70319987 | 21 | 0.307660442 |  |  |  |  |
| **MR-Egger regression analysis** | | | | | | | |
| egger_intercept | se | p-value |  |  |  |  |  |
| 0.023509453 | 0.018917984 | 0.228350118 |  |  |  |  |  |
| **MR PRESSO** | | | | | | | |
| Global Test p-value |  |  |  |  |  |  |  |
| 0.341 |  |  |  |  |  |  |  |
| IHD | **MR analyses** | | | | | | | |
| method | nsnp | b | se | p-value | or | or_lci95 | or_uci95 |
| MR Egger | 22 | 0.036725581 | 0.039287413 | 0.361045478 | 1.037408297 | 0.960522618 | 1.120448342 |
| Weighted median | 22 | 0.031139946 | 0.017647952 | 0.077646547 | 1.031629866 | 0.996555905 | 1.067938261 |
| Inverse variance weighted | 22 | 0.033571964 | 0.013532901 | 0.013110033 | 1.034141862 | 1.007072369 | 1.061938965 |
| Simple mode | 22 | 0.032036017 | 0.028755642 | 0.277834929 | 1.032554694 | 0.975968428 | 1.09242181 |
| Weighted mode | 22 | 0.031105984 | 0.02223361 | 0.176394388 | 1.031594831 | 0.987605559 | 1.077543443 |
| **Cochran Q test** | | | | | | | |
| method | Q | Q_df | Q_p-value |  |  |  |  |
| MR Egger | 23.73045698 | 20 | 0.254364694 |  |  |  |  |
| Inverse variance weighted | 23.73918972 | 21 | 0.305866396 |  |  |  |  |
| **MR-Egger regression analysis** | | | | | | | |
| egger_intercept | se | p-value |  |  |  |  |  |
| -0.000781347 | 0.009107657 | 0.932486328 |  |  |  |  |  |
| **MR PRESSO** | | | | | | | |
| Global Test p-value |  |  |  |  |  |  |  |
| 0.34 |  |  |  |  |  |  |  |
| HF | **MR analyses** | | | | | | | |
| method | nsnp | b | se | p-value | or | or_lci95 | or_uci95 |
| MR Egger | 22 | 0.074937761 | 0.06020427 | 0.227621696 | 1.077817067 | 0.957851419 | 1.212807755 |
| Weighted median | 22 | 0.035341171 | 0.024138672 | 0.143169566 | 1.035973092 | 0.988100736 | 1.08616481 |
| Inverse variance weighted | 22 | 0.053537449 | 0.020808188 | 0.010084947 | 1.0549965 | 1.012835072 | 1.098912987 |
| Simple mode | 22 | 0.015989255 | 0.041417275 | 0.703340991 | 1.016117767 | 0.936890746 | 1.102044525 |
| Weighted mode | 22 | 0.032578547 | 0.031733061 | 0.316269303 | 1.033115038 | 0.970816069 | 1.099411841 |
| **Cochran Q test** | | | | | | | |
| method | Q | Q_df | Q_p-value |  |  |  |  |
| MR Egger | 32.70026275 | 20 | 0.036384772 |  |  |  |  |
| Inverse variance weighted | 32.93623804 | 21 | 0.046928939 |  |  |  |  |
| **MR-Egger regression analysis** | | | | | | | |
| egger_intercept | se | p-value |  |  |  |  |  |
| -0.005307902 | 0.013971732 | 0.708021729 |  |  |  |  |  |
| **MR PRESSO** | | | | | | | |
| Global Test p-value |  |  |  |  |  |  |  |
| 0.055 |  |  |  |  |  |  |  |

**Table S4.** Genetic association estimates for the causal effect of ER- BC on CVD

| CHD | **MR analyses** | | | | | | | |
| --- | --- | --- | --- | --- | --- | --- | --- | --- |
| method | nsnp | b | se | p-value | or | or_lci95 | or_uci95 |
| MR Egger | 17 | 0.109421353 | 0.049863019 | 0.044363743 | 1.115632326 | 1.011758429 | 1.230170614 |
| Weighted median | 17 | -0.006942863 | 0.031666651 | 0.826456553 | 0.993081183 | 0.933317814 | 1.056671395 |
| Inverse variance weighted | 17 | -0.030900706 | 0.026646968 | 0.246198206 | 0.969571841 | 0.920232648 | 1.021556403 |
| Simple mode | 17 | 0.033087173 | 0.063497635 | 0.609449957 | 1.033640641 | 0.912681607 | 1.170630553 |
| Weighted mode | 17 | 0.045762158 | 0.050781423 | 0.380868509 | 1.046825402 | 0.94765058 | 1.156379204 |
| **Cochran Q test** | | | | | | | |
| method | Q | Q_df | Q_p-value |  |  |  |  |
| MR Egger | 14.26573748 | 15 | 0.505477986 |  |  |  |  |
| Inverse variance weighted | 24.04340522 | 16 | 0.088560756 |  |  |  |  |
| **MR-Egger regression analysis** | | | | | | | |
| egger_intercept | se | p-value |  |  |  |  |  |
| -0.032672299 | 0.010448695 | 0.006925505 |  |  |  |  |  |
| **MR PRESSO** | | | | | | | |
| Global Test p-value |  |  |  |  |  |  |  |
| 0.069 |  |  |  |  |  |  |  |
| HHD | **MR analyses** | | | | | | | |
| method | nsnp | b | se | p-value | or | or_lci95 | or_uci95 |
| MR Egger | 17 | -0.212702501 | 0.091533289 | 0.034595361 | 0.808396598 | 0.675631312 | 0.967250997 |
| Weighted median | 17 | -0.100163351 | 0.054729508 | 0.067227125 | 0.904689624 | 0.812667537 | 1.007131796 |
| Inverse variance weighted | 17 | -0.053791289 | 0.03996995 | 0.178369206 | 0.947629867 | 0.876224982 | 1.024853642 |
| Simple mode | 17 | -0.11695111 | 0.096192975 | 0.241696875 | 0.889628686 | 0.736762757 | 1.074211733 |
| Weighted mode | 17 | -0.114348178 | 0.073045222 | 0.13704058 | 0.891947345 | 0.77296863 | 1.029239785 |
| **Cochran Q test** | | | | | | | |
| method | Q | Q_df | Q_p-value |  |  |  |  |
| MR Egger | 11.33034141 | 15 | 0.72884487 |  |  |  |  |
| Inverse variance weighted | 15.05452945 | 16 | 0.520648374 |  |  |  |  |
| **MR-Egger regression analysis** | | | | | | | |
| egger_intercept | se | p-value |  |  |  |  |  |
| 0.037026107 | 0.019186345 | 0.072763385 |  |  |  |  |  |
| **MR PRESSO** | | | | | | | |
| Global Test p-value |  |  |  |  |  |  |  |
| 0.573 |  |  |  |  |  |  |  |
| IHD | **MR analyses** | | | | | | | |
| method | nsnp | b | se | p-value | or | or_lci95 | or_uci95 |
| MR Egger | 17 | 0.091434437 | 0.050613289 | 0.090935695 | 1.095744934 | 0.992262481 | 1.210019509 |
| Weighted median | 17 | 0.01534178 | 0.025288809 | 0.544074714 | 1.015460069 | 0.96635474 | 1.067060686 |
| Inverse variance weighted | 17 | -0.015665785 | 0.024981111 | 0.53059027 | 0.984456285 | 0.937415402 | 1.033857749 |
| Simple mode | 17 | 0.027843152 | 0.03457741 | 0.432484867 | 1.028234396 | 0.960858069 | 1.100335217 |
| Weighted mode | 17 | 0.029139529 | 0.033344645 | 0.395106173 | 1.029568239 | 0.964431977 | 1.099103705 |
| **Cochran Q test** | | | | | | | |
| method | Q | Q_df | Q_p-value |  |  |  |  |
| MR Egger | 21.28712864 | 15 | 0.127903584 |  |  |  |  |
| Inverse variance weighted | 29.13098211 | 16 | 0.023067735 |  |  |  |  |
| **MR-Egger regression analysis** | | | | | | | |
| egger_intercept | se | p-value |  |  |  |  |  |
| -0.024945194 | 0.010610481 | 0.032814599 |  |  |  |  |  |
| **MR PRESSO** | | | | | | | |
| Global Test p-value |  |  |  |  |  |  |  |
| 0.153 |  |  |  |  |  |  |  |
| HF | **MR analyses** | | | | | | | |
| method | nsnp | b | se | p-value | or | or_lci95 | or_uci95 |
| MR Egger | 17 | -0.073919224 | 0.055407529 | 0.202072908 | 0.928746711 | 0.833169662 | 1.03528788 |
| Weighted median | 17 | -0.028287551 | 0.033555536 | 0.399224535 | 0.972108796 | 0.910231423 | 1.038192581 |
| Inverse variance weighted | 17 | -0.012218379 | 0.024181741 | 0.613367153 | 0.987855962 | 0.942127568 | 1.035803893 |
| Simple mode | 17 | -0.034825859 | 0.057838147 | 0.555527801 | 0.965773582 | 0.862268453 | 1.081703278 |
| Weighted mode | 17 | -0.037276069 | 0.051183275 | 0.476962992 | 0.96341013 | 0.871451307 | 1.065072796 |
| **Cochran Q test** | | | | | | | |
| method | Q | Q_df | Q_p-value |  |  |  |  |
| MR Egger | 9.89627998 | 15 | 0.826212951 |  |  |  |  |
| Inverse variance weighted | 11.42812312 | 16 | 0.782320716 |  |  |  |  |
| **MR-Egger regression analysis** | | | | | | | |
| egger_intercept | se | p-value |  |  |  |  |  |
| 0.014359714 | 0.011602154 | 0.234860105 |  |  |  |  |  |
| **MR PRESSO** | | | | | | | |
| Global Test p-value |  |  |  |  |  |  |  |
| 0.825 |  |  |  |  |  |  |  |

**Table S5.** Genetic association estimates for the causal effect of ER+ BC on potential mediators

| **Insulin and glycaemic traits** | | | | | | | | |
| --- | --- | --- | --- | --- | --- | --- | --- | --- |
| **Fasting insulin** | | | | | | | | |
|  | **MR analyses** | | | | | | | |
|  | method | nsnp | b | se | pval | or | or_lci95 | or_uci95 |
|  | MR Egger | 3 | 0.007692615 | 0.019256752 | 0.758049614 | 1.007722279 | 0.970396411 | 1.04648387 |
|  | Weighted median | 3 | -0.012419078 | 0.006013912 | 0.038917506 | 0.987657721 | 0.976084279 | 0.99936839 |
|  | Inverse variance weighted | 3 | -0.015255108 | 0.00598292 | 0.010779199 | 0.984860661 | 0.973379121 | 0.996477632 |
|  | Simple mode | 3 | -0.012788039 | 0.008116475 | 0.255815089 | 0.987293381 | 0.9717115 | 1.003125124 |
|  | Weighted mode | 3 | -0.010905399 | 0.006280373 | 0.224622574 | 0.98915385 | 0.977052463 | 1.001405119 |
|  | **Cochran Q test** | | | | | | | |
|  | method | Q | Q_df | Q_pval |  |  |  |  |
|  | MR Egger | 1.091160849 | 1 | 0.296214145 |  |  |  |  |
|  | Inverse variance weighted | 2.768323121 | 2 | 0.250533769 |  |  |  |  |
|  | **MR-Egger regression analysis** | | | | | | | |
|  | egger_intercept | se | pval |  |  |  |  |  |
|  | -0.005597187 | 0.004514677 | 0.432106213 |  |  |  |  |  |
|  | **MR PRESSO** | | | | | | | |
|  | Global Test Pvalue |  |  |  |  |  |  |  |
|  | NA |  |  |  |  |  |  |  |
| **Fasting glucose** | | | | | | | | |
|  | **MR analyses** | | | | | | | |
|  | method | nsnp | b | se | pval | or | or_lci95 | or_uci95 |
|  | MR Egger | 3 | 0.015724098 | 0.01843481 | 0.550413911 | 1.015848372 | 0.979798707 | 1.053224409 |
|  | Weighted median | 3 | -0.006660097 | 0.005708359 | 0.243320643 | 0.993362033 | 0.98230986 | 1.004538556 |
|  | Inverse variance weighted | 3 | -0.005933791 | 0.005085338 | 0.243273737 | 0.994083779 | 0.984224702 | 1.004041616 |
|  | Simple mode | 3 | -0.013566155 | 0.009390455 | 0.285399566 | 0.98652545 | 0.968534237 | 1.004850864 |
|  | Weighted mode | 3 | -0.00082511 | 0.005860374 | 0.900932762 | 0.99917523 | 0.987764031 | 1.010718257 |
|  | **Cochran Q test** | | | | | | | |
|  | method | Q | Q_df | Q_pval |  |  |  |  |
|  | MR Egger | 0.015263177 | 1 | 0.90167615 |  |  |  |  |
|  | Inverse variance weighted | 1.509185794 | 2 | 0.470201996 |  |  |  |  |
|  | **MR-Egger regression analysis** | | | | | | | |
|  | egger_intercept | se | pval |  |  |  |  |  |
|  | -0.005282583 | 0.004321975 | 0.436538997 |  |  |  |  |  |
|  | **MR PRESSO** | | | | | | | |
|  | Global Test Pvalue |  |  |  |  |  |  |  |
|  | NA |  |  |  |  |  |  |  |
| **HbA1C** | | | | | | | | |
|  | **MR analyses** | | | | | | | |
|  | method | nsnp | b | se | pval | or | or_lci95 | or_uci95 |
|  | MR Egger | 11 | 0.009207267 | 0.017684061 | 0.615173567 | 1.009249785 | 0.974867717 | 1.044844454 |
|  | Weighted median | 11 | -0.00077325 | 0.003209798 | 0.809630186 | 0.999227048 | 0.992960441 | 1.005533205 |
|  | Inverse variance weighted | 11 | -0.001443307 | 0.00537357 | 0.788242412 | 0.998557734 | 0.988095917 | 1.00913032 |
|  | Simple mode | 11 | -0.001765631 | 0.004563713 | 0.706946978 | 0.998235927 | 0.989346645 | 1.007205079 |
|  | Weighted mode | 11 | -0.001765631 | 0.003816734 | 0.653551548 | 0.998235927 | 0.990796187 | 1.005731531 |
|  | **Cochran Q test** | | | | | | | |
|  | method | Q | Q_df | Q_pval |  |  |  |  |
|  | MR Egger | 55.45050066 | 9 | 9.99387E-09 |  |  |  |  |
|  | Inverse variance weighted | 57.92870372 | 10 | 8.91612E-09 |  |  |  |  |
|  | **MR-Egger regression analysis** | | | | | | | |
|  | egger_intercept | se | pval |  |  |  |  |  |
|  | -0.00234207 | 0.00369286 | 0.541722555 |  |  |  |  |  |
|  | **MR PRESSO** | | | | | | | |
|  | Global Test Pvalue |  |  |  |  |  |  |  |
|  | 0.2 |  |  |  |  |  |  |  |
| **Lipid traits** | | | | | | | | |
| **Triglycerides** | | | | | | | | |
|  | **MR analyses** | | | | | | | |
|  | method | nsnp | b | se | pval | or | or_lci95 | or_uci95 |
|  | MR Egger | 13 | -0.010168626 | 0.012260907 | 0.424536341 | 0.9898829 | 0.966378207 | 1.013959285 |
|  | Weighted median | 13 | 0.000733411 | 0.004311198 | 0.864917628 | 1.00073368 | 0.992313159 | 1.009225655 |
|  | Inverse variance weighted | 13 | -0.000196545 | 0.003791724 | 0.958659982 | 0.999803474 | 0.992400697 | 1.007261472 |
|  | Simple mode | 13 | 0.010184746 | 0.00841289 | 0.249349155 | 1.010236788 | 0.993715314 | 1.027032946 |
|  | Weighted mode | 13 | 0.002088611 | 0.006198446 | 0.741969242 | 1.002090793 | 0.989990093 | 1.014339402 |
|  | **Cochran Q test** | | | | | | | |
|  | method | Q | Q_df | Q_pval |  |  |  |  |
|  | MR Egger | 18.81669605 | 11 | 0.064464284 |  |  |  |  |
|  | Inverse variance weighted | 20.07093443 | 12 | 0.065755964 |  |  |  |  |
|  | **MR-Egger regression analysis** | | | | | | | |
|  | egger_intercept | se | pval |  |  |  |  |  |
|  | 0.00220526 | 0.002575402 | 0.410109674 |  |  |  |  |  |
|  | **MR PRESSO** | | | | | | | |
|  | Global Test Pvalue |  |  |  |  |  |  |  |
|  | 0.104 |  |  |  |  |  |  |  |
| **Total cholesterol** | | | | | | | | |
|  | **MR analyses** | | | | | | | |
|  | method | nsnp | b | se | pval | or | or_lci95 | or_uci95 |
|  | MR Egger | 23 | -0.005650422 | 0.008409072 | 0.508945316 | 0.994365512 | 0.978110917 | 1.010890231 |
|  | Weighted median | 23 | -0.006539149 | 0.003327217 | 0.049373682 | 0.993482185 | 0.987024423 | 0.999982198 |
|  | Inverse variance weighted | 23 | -0.006988296 | 0.003085208 | 0.023506731 | 0.993036065 | 0.987049287 | 0.999059155 |
|  | Simple mode | 23 | -0.005977407 | 0.005873811 | 0.319911896 | 0.994040422 | 0.982661988 | 1.00555061 |
|  | Weighted mode | 23 | -0.006505041 | 0.004900182 | 0.197951664 | 0.993516071 | 0.984019664 | 1.003104124 |
|  | **Cochran Q test** | | | | | | | |
|  | method | Q | Q_df | Q_pval |  |  |  |  |
|  | MR Egger | 40.94110807 | 21 | 0.005701877 |  |  |  |  |
|  | Inverse variance weighted | 40.99854497 | 22 | 0.008244361 |  |  |  |  |
|  | **MR-Egger regression analysis** | | | | | | | |
|  | egger_intercept | se | pval |  |  |  |  |  |
|  | -0.000337591 | 0.001966823 | 0.865361667 |  |  |  |  |  |
|  | **MR PRESSO** | | | | | | | |
|  | Global Test Pvalue |  |  |  |  |  |  |  |
|  | 0.01 |  |  |  |  |  |  |  |
| **HDL cholesterol** | | | | | | | | |
|  | **MR analyses** | | | | | | | |
|  | method | nsnp | b | se | pval | or | or_lci95 | or_uci95 |
|  | MR Egger | 10 | 0.019448812 | 0.025402632 | 0.465887101 | 1.019639173 | 0.970115302 | 1.071691211 |
|  | Weighted median | 10 | -0.030950306 | 0.010891321 | 0.004486801 | 0.969523751 | 0.949046679 | 0.990442647 |
|  | Inverse variance weighted | 10 | -0.027183795 | 0.007955794 | 0.00063349 | 0.973182359 | 0.958124883 | 0.988476472 |
|  | Simple mode | 10 | -0.041586426 | 0.020090302 | 0.068366783 | 0.959266426 | 0.922227428 | 0.997793005 |
|  | Weighted mode | 10 | -0.041393651 | 0.0158298 | 0.028043603 | 0.959451366 | 0.9301401 | 0.989686311 |
|  | **Cochran Q test** | | | | | | | |
|  | method | Q | Q_df | Q_pval |  |  |  |  |
|  | MR Egger | 2.830674262 | 8 | 0.94452993 |  |  |  |  |
|  | Inverse variance weighted | 6.567106631 | 9 | 0.682088601 |  |  |  |  |
|  | **MR-Egger regression analysis** | | | | | | | |
|  | egger_intercept | se | pval |  |  |  |  |  |
|  | -0.010171342 | 0.005261986 | 0.089308232 |  |  |  |  |  |
|  | **MR PRESSO** | | | | | | | |
|  | Global Test Pvalue |  |  |  |  |  |  |  |
|  | 0.63 |  |  |  |  |  |  |  |
| **LDL cholesterol** | | | | | | | | |
|  | **MR analyses** | | | | | | | |
|  | method | nsnp | b | se | pval | or | or_lci95 | or_uci95 |
|  | MR Egger | 15 | -0.061434913 | 0.059840588 | 0.323313184 | 0.940414153 | 0.836337981 | 1.057441846 |
|  | Weighted median | 15 | -0.058648945 | 0.028558423 | 0.040009782 | 0.943037769 | 0.891701847 | 0.997329137 |
|  | Inverse variance weighted | 15 | -0.050334931 | 0.021843763 | 0.021204918 | 0.950910882 | 0.91105801 | 0.992507058 |
|  | Simple mode | 15 | -0.071965144 | 0.041667928 | 0.106134042 | 0.930563331 | 0.857585597 | 1.009751232 |
|  | Weighted mode | 15 | -0.065157798 | 0.038103376 | 0.109320556 | 0.936919608 | 0.869496982 | 1.009570325 |
|  | **Cochran Q test** | | | | | | | |
|  | method | Q | Q_df | Q_pval |  |  |  |  |
|  | MR Egger | 16.03097841 | 13 | 0.247461081 |  |  |  |  |
|  | Inverse variance weighted | 16.08049122 | 14 | 0.30848352 |  |  |  |  |
|  | **MR-Egger regression analysis** | | | | | | | |
|  | egger_intercept | se | pval |  |  |  |  |  |
|  | 0.002607983 | 0.013015306 | 0.84428555 |  |  |  |  |  |
|  | **MR PRESSO** | | | | | | | |
|  | Global Test Pvalue |  |  |  |  |  |  |  |
|  | 0.317 |  |  |  |  |  |  |  |
| **Apolipoprotein A1** | | | | | | | | |
|  | **MR analyses** | | | | | | | |
|  | method | nsnp | b | se | pval | or | or_lci95 | or_uci95 |
|  | MR Egger | 6 | -0.01049277 | 0.024816891 | 0.694175394 | 0.989562087 | 0.942580572 | 1.038885326 |
|  | Weighted median | 6 | -0.001250049 | 0.005593382 | 0.823156379 | 0.998750732 | 0.987861199 | 1.009760304 |
|  | Inverse variance weighted | 6 | -0.000398291 | 0.006038194 | 0.947408168 | 0.999601789 | 0.98784137 | 1.011502217 |
|  | Simple mode | 6 | 0.009001229 | 0.01018529 | 0.417294843 | 1.009041862 | 0.989097923 | 1.029387945 |
|  | Weighted mode | 6 | -0.002320546 | 0.006330721 | 0.728952514 | 0.997682144 | 0.985379179 | 1.010138718 |
|  | **Cochran Q test** | | | | | | | |
|  | method | Q | Q_df | Q_pval |  |  |  |  |
|  | MR Egger | 10.00570937 | 4 | 0.040331618 |  |  |  |  |
|  | Inverse variance weighted | 10.45113292 | 5 | 0.063416333 |  |  |  |  |
|  | **MR-Egger regression analysis** | | | | | | | |
|  | egger_intercept | se | pval |  |  |  |  |  |
|  | 0.002152439 | 0.0051008 | 0.694731431 |  |  |  |  |  |
|  | **MR PRESSO** | | | | | | | |
|  | Global Test Pvalue |  |  |  |  |  |  |  |
|  | 0.079 |  |  |  |  |  |  |  |
| **Apolipoprotein B** | | | | | | | | |
|  | **MR analyses** | | | | | | | |
|  | method | nsnp | b | se | pval | or | or_lci95 | or_uci95 |
|  | MR Egger | 6 | -0.017967632 | 0.025259153 | 0.516162054 | 0.982192823 | 0.934750554 | 1.032042974 |
|  | Weighted median | 6 | -0.010340001 | 0.005440339 | 0.057352179 | 0.989713273 | 0.979215964 | 1.000323115 |
|  | Inverse variance weighted | 6 | -0.009793289 | 0.006098255 | 0.108292203 | 0.990254509 | 0.978488868 | 1.002161623 |
|  | Simple mode | 6 | -0.010357368 | 0.007827167 | 0.243027994 | 0.989696085 | 0.974628784 | 1.004996319 |
|  | Weighted mode | 6 | -0.010145217 | 0.006021827 | 0.15285436 | 0.989906072 | 0.978291108 | 1.001658938 |
|  | **Cochran Q test** | | | | | | | |
|  | method | Q | Q_df | Q_pval |  |  |  |  |
|  | MR Egger | 10.58614147 | 4 | 0.031630875 |  |  |  |  |
|  | Inverse variance weighted | 10.88445005 | 5 | 0.053719746 |  |  |  |  |
|  | **MR-Egger regression analysis** | | | | | | | |
|  | egger_intercept | se | pval |  |  |  |  |  |
|  | 0.001743445 | 0.00519295 | 0.753943353 |  |  |  |  |  |
|  | **MR PRESSO** | | | | | | | |
|  | Global Test Pvalue |  |  |  |  |  |  |  |
|  | 0.102 |  |  |  |  |  |  |  |
| **Amino acids traits** | | | | | | | | |
| **Isoleucine** | | | | | | | | |
|  | **MR analyses** | | | | | | | |
|  | method | nsnp | b | se | pval | or | or_lci95 | or_uci95 |
|  | MR Egger | 21 | 0.043466329 | 0.034012787 | 0.216663458 | 1.044424827 | 0.977068288 | 1.11642475 |
|  | Weighted median | 21 | 0.021933178 | 0.014336723 | 0.126051412 | 1.022175478 | 0.993852176 | 1.051305951 |
|  | Inverse variance weighted | 21 | 0.026030742 | 0.011457023 | 0.023084479 | 1.0263725 | 1.003581374 | 1.049681208 |
|  | Simple mode | 21 | 0.020383097 | 0.024723489 | 0.41941247 | 1.020592251 | 0.972315498 | 1.07126601 |
|  | Weighted mode | 21 | 0.018855304 | 0.018313769 | 0.315503099 | 1.019034187 | 0.983104671 | 1.05627682 |
|  | **Cochran Q test** | | | | | | | |
|  | method | Q | Q_df | Q_pval |  |  |  |  |
|  | MR Egger | 25.12394316 | 19 | 0.156502797 |  |  |  |  |
|  | Inverse variance weighted | 25.51772346 | 20 | 0.18233704 |  |  |  |  |
|  | **MR-Egger regression analysis** | | | | | | | |
|  | egger_intercept | se | pval |  |  |  |  |  |
|  | -0.004290302 | 0.007861908 | 0.591617071 |  |  |  |  |  |
|  | **MR PRESSO** | | | | | | | |
|  | Global Test Pvalue |  |  |  |  |  |  |  |
|  | 0.2 |  |  |  |  |  |  |  |
| **Phenylalanine** | | | | | | | | |
|  | **MR analyses** | | | | | | | |
|  | method | nsnp | b | se | pval | or | or_lci95 | or_uci95 |
|  | MR Egger | 21 | 0.014629933 | 0.026019441 | 0.580506321 | 1.014737474 | 0.964285206 | 1.06782945 |
|  | Weighted median | 21 | 0.013897059 | 0.012809456 | 0.277963162 | 1.013994072 | 0.988853118 | 1.039774219 |
|  | Inverse variance weighted | 21 | 0.022733454 | 0.008723051 | 0.009157021 | 1.022993828 | 1.005652187 | 1.040634511 |
|  | Simple mode | 21 | 0.012167089 | 0.025732365 | 0.641452219 | 1.012241409 | 0.962454635 | 1.064603601 |
|  | Weighted mode | 21 | 0.005674876 | 0.020870755 | 0.788481664 | 1.005691009 | 0.965381612 | 1.04768352 |
|  | **Cochran Q test** | | | | | | | |
|  | method | Q | Q_df | Q_pval |  |  |  |  |
|  | MR Egger | 21.6411122 | 19 | 0.302479828 |  |  |  |  |
|  | Inverse variance weighted | 21.76631844 | 20 | 0.353324303 |  |  |  |  |
|  | **MR-Egger regression analysis** | | | | | | | |
|  | egger_intercept | se | pval |  |  |  |  |  |
|  | 0.001992035 | 0.006008235 | 0.743857664 |  |  |  |  |  |
|  | **MR PRESSO** | | | | | | | |
|  | Global Test Pvalue |  |  |  |  |  |  |  |
|  | 0.376 |  |  |  |  |  |  |  |
| **Alanine** | | | | | | | | |
|  | **MR analyses** | | | | | | | |
|  | method | nsnp | b | se | pval | or | or_lci95 | or_uci95 |
|  | MR Egger | 21 | 0.030245387 | 0.03216488 | 0.358853942 | 1.030707425 | 0.967734237 | 1.097778455 |
|  | Weighted median | 21 | 0.02048736 | 0.014419436 | 0.15537037 | 1.020698667 | 0.99225541 | 1.049957256 |
|  | Inverse variance weighted | 21 | 0.021395291 | 0.010773016 | 0.047032488 | 1.021625812 | 1.000280219 | 1.043426911 |
|  | Simple mode | 21 | -0.001374137 | 0.025725499 | 0.957930911 | 0.998626807 | 0.949522441 | 1.050270595 |
|  | Weighted mode | 21 | 0.022711284 | 0.019469808 | 0.257139057 | 1.022971149 | 0.984669192 | 1.062762987 |
|  | **Cochran Q test** | | | | | | | |
|  | method | Q | Q_df | Q_pval |  |  |  |  |
|  | MR Egger | 26.35163932 | 19 | 0.120685465 |  |  |  |  |
|  | Inverse variance weighted | 26.47062563 | 20 | 0.150825063 |  |  |  |  |
|  | **MR-Egger regression analysis** | | | | | | | |
|  | egger_intercept | se | pval |  |  |  |  |  |
|  | -0.002176923 | 0.00743227 | 0.772772391 |  |  |  |  |  |
|  | **MR PRESSO** | | | | | | | |
|  | Global Test Pvalue |  |  |  |  |  |  |  |
|  | 0.165 |  |  |  |  |  |  |  |
| **Glutamine** | | | | | | | | |
|  | **MR analyses** | | | | | | | |
|  | method | nsnp | b | se | pval | or | or_lci95 | or_uci95 |
|  | MR Egger | 21 | 0.033375246 | 0.015319621 | 0.042158613 | 1.033938448 | 1.003354402 | 1.06545475 |
|  | Weighted median | 21 | 0.01030925 | 0.00732728 | 0.159436858 | 1.010362573 | 0.995955979 | 1.02497756 |
|  | Inverse variance weighted | 21 | 0.011586286 | 0.005259292 | 0.027593856 | 1.011653667 | 1.001278892 | 1.022135942 |
|  | Simple mode | 21 | 0.001545229 | 0.014397781 | 0.915601207 | 1.001546423 | 0.973678197 | 1.030212282 |
|  | Weighted mode | 21 | 0.008537885 | 0.010287249 | 0.416365069 | 1.008574437 | 0.988442189 | 1.029116732 |
|  | **Cochran Q test** | | | | | | | |
|  | method | Q | Q_df | Q_pval |  |  |  |  |
|  | MR Egger | 17.58528461 | 19 | 0.550279656 |  |  |  |  |
|  | Inverse variance weighted | 19.87846576 | 20 | 0.465555013 |  |  |  |  |
|  | **MR-Egger regression analysis** | | | | | | | |
|  | egger_intercept | se | pval |  |  |  |  |  |
|  | -0.005352407 | 0.003534516 | 0.146401966 |  |  |  |  |  |
|  | **MR PRESSO** | | | | | | | |
|  | Global Test Pvalue |  |  |  |  |  |  |  |
|  | 0.504 |  |  |  |  |  |  |  |
| **Leucine** | | | | | | | | |
|  | **MR analyses** | | | | | | | |
|  | method | nsnp | b | se | pval | or | or_lci95 | or_uci95 |
|  | MR Egger | 13 | -0.030868563 | 0.027429068 | 0.284377022 | 0.969603007 | 0.918852623 | 1.023156453 |
|  | Weighted median | 13 | 0.002917188 | 0.008203653 | 0.722142999 | 1.002921447 | 0.986924268 | 1.019177925 |
|  | Inverse variance weighted | 13 | 0.004004251 | 0.008837026 | 0.650460858 | 1.004012279 | 0.98677195 | 1.021553822 |
|  | Simple mode | 13 | 0.001755023 | 0.013493357 | 0.898669314 | 1.001756564 | 0.975610395 | 1.028603444 |
|  | Weighted mode | 13 | 0.001387727 | 0.009574337 | 0.887162387 | 1.00138869 | 0.982772152 | 1.020357879 |
|  | **Cochran Q test** | | | | | | | |
|  | method | Q | Q_df | Q_pval |  |  |  |  |
|  | MR Egger | 25.91140032 | 11 | 0.006689794 |  |  |  |  |
|  | Inverse variance weighted | 30.12977891 | 12 | 0.002669497 |  |  |  |  |
|  | **MR-Egger regression analysis** | | | | | | | |
|  | egger_intercept | se | pval |  |  |  |  |  |
|  | 0.007648118 | 0.005715193 | 0.207833325 |  |  |  |  |  |
|  | **MR PRESSO** | | | | | | | |
|  | Global Test Pvalue |  |  |  |  |  |  |  |
|  | 0.577 |  |  |  |  |  |  |  |
| **Valine** |  | | |  | | | | |
|  | **MR analyses** | | | | | | | |
|  | method | nsnp | b | se | pval | or | or_lci95 | or_uci95 |
|  | MR Egger | 13 | -0.052218969 | 0.024299914 | 0.054748123 | 0.949121016 | 0.90497605 | 0.995419384 |
|  | Weighted median | 13 | -0.001120659 | 0.008330453 | 0.892986945 | 0.998879968 | 0.982702993 | 1.015323244 |
|  | Inverse variance weighted | 13 | 0.004307875 | 0.009024077 | 0.633094601 | 1.004317168 | 0.986709789 | 1.022238741 |
|  | Simple mode | 13 | 0.00360908 | 0.012566534 | 0.778859965 | 1.003615601 | 0.979198082 | 1.028642 |
|  | Weighted mode | 13 | -0.001608655 | 0.009157013 | 0.863479145 | 0.998392638 | 0.980633586 | 1.016473303 |
|  | **Cochran Q test** | | | | | | | |
|  | method | Q | Q_df | Q_pval |  |  |  |  |
|  | MR Egger | 19.76624209 | 11 | 0.048651399 |  |  |  |  |
|  | Inverse variance weighted | 30.53894983 | 12 | 0.002315077 |  |  |  |  |
|  | **MR-Egger regression analysis** | | | | | | | |
|  | egger_intercept | se | pval |  |  |  |  |  |
|  | 0.012396807 | 0.005063061 | 0.032332787 |  |  |  |  |  |
|  | **MR PRESSO** | | | | | | | |
|  | Global Test Pvalue |  |  |  |  |  |  |  |
|  | 0.606 |  |  |  |  |  |  |  |
| **Tyrosine** | | | | | | | | |
|  | **MR analyses** | | | | | | | |
|  | method | nsnp | b | se | pval | or | or_lci95 | or_uci95 |
|  | MR Egger | 13 | 0.008856109 | 0.031504944 | 0.783849176 | 1.008895441 | 0.948480943 | 1.073158104 |
|  | Weighted median | 13 | 0.008993227 | 0.008793616 | 0.306449947 | 1.009033788 | 0.991791613 | 1.026575715 |
|  | Inverse variance weighted | 13 | 0.00951495 | 0.009412827 | 0.312088517 | 1.009560362 | 0.991105601 | 1.028358757 |
|  | Simple mode | 13 | 0.03708107 | 0.017887777 | 0.060368371 | 1.03777715 | 1.002023071 | 1.074807003 |
|  | Weighted mode | 13 | 0.012978005 | 0.010926732 | 0.257917769 | 1.013062585 | 0.991597113 | 1.034992728 |
|  | **Cochran Q test** | | | | | | | |
|  | method | Q | Q_df | Q_pval |  |  |  |  |
|  | MR Egger | 31.51678231 | 11 | 0.000911412 |  |  |  |  |
|  | Inverse variance weighted | 31.51817049 | 12 | 0.001641385 |  |  |  |  |
|  | **MR-Egger regression analysis** | | | | | | | |
|  | egger_intercept | se | pval |  |  |  |  |  |
|  | 0.00014449 | 0.006564305 | 0.98283304 |  |  |  |  |  |
|  | **MR PRESSO** | | | | | | | |
|  | Global Test Pvalue |  |  |  |  |  |  |  |
|  | 0.728 |  |  |  |  |  |  |  |
| **Glycine** | | | | | | | | |
|  | **MR analyses** | | | | | | | |
|  | method | nsnp | b | se | pval | or | or_lci95 | or_uci95 |
|  | MR Egger | 13 | -0.001982186 | 0.022600273 | 0.93168642 | 0.998019777 | 0.954775808 | 1.043222364 |
|  | Weighted median | 13 | 0.005218633 | 0.007604843 | 0.492571263 | 1.005232274 | 0.990359907 | 1.020327981 |
|  | Inverse variance weighted | 13 | 0.005836358 | 0.006790847 | 0.390095217 | 1.005853422 | 0.992554156 | 1.019330886 |
|  | Simple mode | 13 | 0.004275083 | 0.012061939 | 0.729168776 | 1.004284234 | 0.980820004 | 1.028309801 |
|  | Weighted mode | 13 | 0.0048929 | 0.008195563 | 0.561590864 | 1.00490489 | 0.988891754 | 1.021177327 |
|  | **Cochran Q test** | | | | | | | |
|  | method | Q | Q_df | Q_pval |  |  |  |  |
|  | MR Egger | 18.14231036 | 11 | 0.07833671 |  |  |  |  |
|  | Inverse variance weighted | 18.36098119 | 12 | 0.105161411 |  |  |  |  |
|  | **MR-Egger regression analysis** | | | | | | | |
|  | egger_intercept | se | pval |  |  |  |  |  |
|  | 0.001713843 | 0.004706797 | 0.722670164 |  |  |  |  |  |
|  | **MR PRESSO** | | | | | | | |
|  | Global Test Pvalue |  |  |  |  |  |  |  |
|  | 0.143 |  |  |  |  |  |  |  |
| **Histidine** | | | | | | | | |
|  | **MR analyses** | | | | | | | |
|  | method | nsnp | b | se | pval | or | or_lci95 | or_uci95 |
|  | MR Egger | 23 | -0.01075519 | 0.013613317 | 0.438329891 | 0.98930244 | 0.96325482 | 1.016054421 |
|  | Weighted median | 23 | -0.007269028 | 0.006927243 | 0.294021984 | 0.992757328 | 0.979369362 | 1.006328307 |
|  | Inverse variance weighted | 23 | -0.004062528 | 0.005151234 | 0.430315794 | 0.995945713 | 0.985940819 | 1.006052132 |
|  | Simple mode | 23 | -0.015874245 | 0.012251689 | 0.20851662 | 0.984251087 | 0.960897481 | 1.008172277 |
|  | Weighted mode | 23 | -0.011716249 | 0.010151008 | 0.260804483 | 0.988352119 | 0.968882217 | 1.008213273 |
|  | **Cochran Q test** | | | | | | | |
|  | method | Q | Q_df | Q_pval |  |  |  |  |
|  | MR Egger | 26.79545613 | 21 | 0.177726583 |  |  |  |  |
|  | Inverse variance weighted | 27.15742703 | 22 | 0.205308133 |  |  |  |  |
|  | **MR-Egger regression analysis** | | | | | | | |
|  | egger_intercept | se | pval |  |  |  |  |  |
|  | 0.00169209 | 0.003176929 | 0.599889167 |  |  |  |  |  |
|  | **MR PRESSO** | | | | | | | |
|  | Global Test Pvalue |  |  |  |  |  |  |  |
|  | 0.216 |  |  |  |  |  |  |  |

**Table S6.** Genetic association estimates for the causal effect of selected mediators (Fasting insulin) on CVD

| CHD | **MR analyses** | | | | | | | |
| --- | --- | --- | --- | --- | --- | --- | --- | --- |
| method | nsnp | b | se | pval | or | or_lci95 | or_uci95 |
| MR Egger | 28 | 0.170339279 | 1.377582641 | 0.902542676 | 1.185707068 | 0.079681113 | 17.64409656 |
| Weighted median | 28 | 0.494021154 | 0.335286433 | 0.140635074 | 1.638893229 | 0.849472038 | 3.161929878 |
| Inverse variance weighted | 28 | 0.604840017 | 0.314776719 | 0.054670082 | 1.830959264 | 0.987950827 | 3.393298264 |
| Simple mode | 28 | 0.036811695 | 0.873657387 | 0.966701003 | 1.037497636 | 0.187203918 | 5.749886837 |
| Weighted mode | 28 | -0.159834184 | 1.154286451 | 0.890896482 | 0.8522851 | 0.088723044 | 8.187161534 |
| **Cochran Q test** | | | | | | | |
| method | Q | Q_df | Q_pval |  |  |  |  |
| MR Egger | 71.20829747 | 26 | 4.42E-06 |  |  |  |  |
| Inverse variance weighted | 71.49631081 | 27 | 6.84E-06 |  |  |  |  |
| **MR-Egger regression analysis** | | | | | | | |
| egger_intercept | se | pval |  |  |  |  |  |
| 0.006651842 | 0.020512294 | 0.748316353 |  |  |  |  |  |
| HHD | **MR analyses** | | | | | | | |
| method | nsnp | b | se | pval | or | or_lci95 | or_uci95 |
| MR Egger | 28 | -0.86787229 | 1.728447254 | 0.619815459 | 0.419843906 | 0.014184167 | 12.4271591 |
| Weighted median | 28 | 0.32597147 | 0.542990004 | 0.548288439 | 1.385375843 | 0.477930985 | 4.015781117 |
| Inverse variance weighted | 28 | 0.405929096 | 0.398454269 | 0.308317128 | 1.500696144 | 0.687260914 | 3.276905276 |
| Simple mode | 28 | 0.260097125 | 1.132033032 | 0.820009194 | 1.297056057 | 0.141043402 | 11.92791995 |
| Weighted mode | 28 | 0.463510443 | 1.040594281 | 0.659561104 | 1.589644559 | 0.20678941 | 12.22001565 |
| **Cochran Q test** | | | | | | | |
| method | Q | Q_df | Q_pval |  |  |  |  |
| MR Egger | 33.10813819 | 26 | 0.158983728 |  |  |  |  |
| Inverse variance weighted | 33.83920814 | 27 | 0.170771442 |  |  |  |  |
| **MR-Egger regression analysis** | | | | | | | |
| egger_intercept | se | pval |  |  |  |  |  |
| 0.019502397 | 0.025738856 | 0.455442096 |  |  |  |  |  |
| IHD | **MR analyses** | | | | | | | |
| method | nsnp | b | se | pval | or | or_lci95 | or_uci95 |
| MR Egger | 28 | 0.027633859 | 1.208386168 | 0.981929854 | 1.028019216 | 0.096250315 | 10.97994854 |
| Weighted median | 28 | 0.401684489 | 0.285535153 | 0.159493314 | 1.494339777 | 0.85388017 | 2.615181201 |
| Inverse variance weighted | 28 | 0.537800532 | 0.276785457 | 0.052013369 | 1.712236708 | 0.995312059 | 2.94556317 |
| Simple mode | 28 | 0.689504348 | 0.645195283 | 0.294677786 | 1.99272759 | 0.562660751 | 7.057473341 |
| Weighted mode | 28 | 0.880246558 | 0.8449704 | 0.306767072 | 2.411494206 | 0.46029144 | 12.63396146 |
| **Cochran Q test** | | | | | | | |
| method | Q | Q_df | Q_pval |  |  |  |  |
| MR Egger | 75.6437873 | 26 | 9.67E-07 |  |  |  |  |
| Inverse variance weighted | 76.19201816 | 27 | 1.41E-06 |  |  |  |  |
| **MR-Egger regression analysis** | | | | | | | |
| egger_intercept | se | pval |  |  |  |  |  |
| 0.007809317 | 0.017990005 | 0.667802692 |  |  |  |  |  |
| HF | **MR analyses** | | | | | | | |
| method | nsnp | b | se | pval | or | or_lci95 | or_uci95 |
| MR Egger | 28 | 0.701346158 | 1.022279477 | 0.498747359 | 2.016465363 | 0.271899813 | 14.95452504 |
| Weighted median | 28 | 0.415256974 | 0.311279379 | 0.182193031 | 1.514759944 | 0.822957591 | 2.788111699 |
| Inverse variance weighted | 28 | 0.187523435 | 0.234371749 | 0.423646436 | 1.206258518 | 0.761972212 | 1.90959669 |
| Simple mode | 28 | 0.478164958 | 0.635665371 | 0.458422409 | 1.613111557 | 0.464061047 | 5.607298682 |
| Weighted mode | 28 | 0.321293081 | 0.532506746 | 0.551304944 | 1.378909654 | 0.485575671 | 3.915747738 |
| **Cochran Q test** | | | | | | | |
| method | Q | Q_df | Q_pval |  |  |  |  |
| MR Egger | 31.69968374 | 26 | 0.203238257 |  |  |  |  |
| Inverse variance weighted | 32.02528861 | 27 | 0.231148934 |  |  |  |  |
| **MR-Egger regression analysis** | | | | | | | |
| egger_intercept | se | pval |  |  |  |  |  |
| -0.007865424 | 0.015220099 | 0.60967884 |  |  |  |  |  |

**Table S7.** Genetic association estimates for the causal effect of selected mediators (Total cholesterol) on CVD

| CHD | **MR analyses** | | | | | | | |
| --- | --- | --- | --- | --- | --- | --- | --- | --- |
| method | nsnp | b | se | pval | or | or_lci95 | or_uci95 |
| MR Egger | 276 | 0.806839932 | 0.090637577 | 7.72E-17 | 2.240815656 | 1.876090857 | 2.676445431 |
| Weighted median | 276 | 0.700843673 | 0.067868588 | 5.35E-25 | 2.015452374 | 1.764418617 | 2.302202115 |
| Inverse variance weighted | 276 | 0.491408968 | 0.064849699 | 3.52E-14 | 1.634617723 | 1.439511123 | 1.856168429 |
| Simple mode | 276 | 0.479418144 | 0.164950929 | 0.00395337 | 1.615134353 | 1.168959834 | 2.231607026 |
| Weighted mode | 276 | 0.722816267 | 0.056579932 | 1.18E-29 | 2.060227198 | 1.843967686 | 2.301849507 |
| **Cochran Q test** | | | | | | | |
| method | Q | Q_df | Q_pval |  |  |  |  |
| MR Egger | 872.4812171 | 274 | 1.39E-63 |  |  |  |  |
| Inverse variance weighted | 945.7937659 | 275 | 1.76E-74 |  |  |  |  |
| **MR-Egger regression analysis** | | | | | | | |
| egger_intercept | se | pval |  |  |  |  |  |
| -0.012444017 | 0.002593428 | 2.63E-06 |  |  |  |  |  |
| HHD | **MR analyses** | | | | | | | |
| method | nsnp | b | se | pval | or | or_lci95 | or_uci95 |
| MR Egger | 276 | -0.053051701 | 0.107520866 | 0.622119269 | 0.948330982 | 0.768132835 | 1.17080225 |
| Weighted median | 276 | -0.100510459 | 0.112033566 | 0.369641048 | 0.904375654 | 0.72607915 | 1.126454772 |
| Inverse variance weighted | 276 | -0.038275081 | 0.073990713 | 0.604949726 | 0.962448154 | 0.832520962 | 1.112652402 |
| Simple mode | 276 | 0.14609376 | 0.231144737 | 0.527882892 | 1.157304692 | 0.73568744 | 1.820547799 |
| Weighted mode | 276 | -0.056281121 | 0.096640258 | 0.560789536 | 0.945273362 | 0.782159944 | 1.142402824 |
| **Cochran Q test** | | | | | | | |
| method | Q | Q_df | Q_pval |  |  |  |  |
| MR Egger | 365.1381423 | 274 | 0.000187134 |  |  |  |  |
| Inverse variance weighted | 365.1861039 | 275 | 0.000216916 |  |  |  |  |
| **MR-Egger regression analysis** | | | | | | | |
| egger_intercept | se | pval |  |  |  |  |  |
| 0.000584611 | 0.003081583 | 0.849675761 |  |  |  |  |  |
| IHD | **MR analyses** | | | | | | | |
| method | nsnp | b | se | pval | or | or_lci95 | or_uci95 |
| MR Egger | 276 | 0.750976151 | 0.078788332 | 8.75E-19 | 2.119067538 | 1.815845177 | 2.472924062 |
| Weighted median | 276 | 0.662937894 | 0.053798151 | 6.84E-35 | 1.940484908 | 1.746289965 | 2.156275161 |
| Inverse variance weighted | 276 | 0.459401433 | 0.05667187 | 5.22E-16 | 1.583126095 | 1.416691989 | 1.769113013 |
| Simple mode | 276 | 0.550320181 | 0.156774908 | 0.000522946 | 1.733808061 | 1.275121363 | 2.357493551 |
| Weighted mode | 276 | 0.655506929 | 0.051198909 | 9.40E-30 | 1.926118676 | 1.742214608 | 2.129435223 |
| **Cochran Q test** | | | | | | | |
| method | Q | Q_df | Q_pval |  |  |  |  |
| MR Egger | 910.5870161 | 274 | 2.43E-69 |  |  |  |  |
| Inverse variance weighted | 997.1476954 | 275 | 1.66E-82 |  |  |  |  |
| **MR-Egger regression analysis** | | | | | | | |
| egger_intercept | se | pval |  |  |  |  |  |
| -0.011512114 | 0.002255694 | 6.24E-07 |  |  |  |  |  |
| HF | **MR analyses** | | | | | | | |
| method | nsnp | b | se | pval | or | or_lci95 | or_uci95 |
| MR Egger | 276 | 0.038715578 | 0.065904068 | 0.557382933 | 1.039474792 | 0.913514166 | 1.182803598 |
| Weighted median | 276 | -0.080216849 | 0.068870153 | 0.244118219 | 0.922916192 | 0.806378254 | 1.056296214 |
| Inverse variance weighted | 276 | -0.034410678 | 0.045525251 | 0.449733639 | 0.966174636 | 0.883697764 | 1.056349202 |
| Simple mode | 276 | -0.263991207 | 0.147204978 | 0.074014418 | 0.767980292 | 0.575501777 | 1.024833898 |
| Weighted mode | 276 | -0.027570744 | 0.058364128 | 0.637021704 | 0.97280586 | 0.867652115 | 1.090703549 |
| **Cochran Q test** | | | | | | | |
| method | Q | Q_df | Q_pval |  |  |  |  |
| MR Egger | 374.3591411 | 274 | 5.20E-05 |  |  |  |  |
| Inverse variance weighted | 377.5623255 | 275 | 3.88E-05 |  |  |  |  |
| **MR-Egger regression analysis** | | | | | | | |
| egger_intercept | se | pval |  |  |  |  |  |
| -0.002890557 | 0.001887815 | 0.126882296 |  |  |  |  |  |

**Table S8.** Genetic association estimates for the causal effect of selected mediators (HDL cholesterol) on CVD

| CHD | **MR analyses** | | | | | | | |
| --- | --- | --- | --- | --- | --- | --- | --- | --- |
| method | nsnp | b | se | pval | or | or_lci95 | or_uci95 |
| MR Egger | 126 | 0.006522829 | 0.092378407 | 0.943821994 | 1.006544149 | 0.839844227 | 1.206332187 |
| Weighted median | 126 | -0.007001422 | 0.071275756 | 0.921749609 | 0.993023031 | 0.86355136 | 1.141906302 |
| Inverse variance weighted | 126 | -0.186808094 | 0.052661177 | 0.000389114 | 0.829602927 | 0.74824561 | 0.919806288 |
| Simple mode | 126 | -0.172228624 | 0.215684686 | 0.426083091 | 0.841786699 | 0.551578777 | 1.284684755 |
| Weighted mode | 126 | 0.026873863 | 0.069531942 | 0.699786002 | 1.027238222 | 0.89636396 | 1.177220875 |
| **Cochran Q test** | | | | | | | |
| method | Q | Q_df | Q_pval |  |  |  |  |
| MR Egger | 279.9258769 | 124 | 4.58E-14 |  |  |  |  |
| Inverse variance weighted | 294.2887853 | 125 | 1.10E-15 |  |  |  |  |
| **MR-Egger regression analysis** | | | | | | | |
| egger_intercept | se | pval |  |  |  |  |  |
| -0.009072655 | 0.003596863 | 0.012922506 |  |  |  |  |  |
| HHD | **MR analyses** | | | | | | | |
| method | nsnp | b | se | pval | or | or_lci95 | or_uci95 |
| MR Egger | 126 | 0.156820633 | 0.133964424 | 0.243998745 | 1.169785775 | 0.899649858 | 1.521034818 |
| Weighted median | 126 | -0.01158101 | 0.103772802 | 0.91114084 | 0.988485792 | 0.806561038 | 1.211444782 |
| Inverse variance weighted | 126 | -0.017965841 | 0.075228193 | 0.811246774 | 0.982194583 | 0.847543512 | 1.138237961 |
| Simple mode | 126 | 0.183661229 | 0.200998985 | 0.362611507 | 1.201608685 | 0.810343716 | 1.781791359 |
| Weighted mode | 126 | 0.055413148 | 0.096115241 | 0.565294929 | 1.056977212 | 0.875488971 | 1.276087838 |
| **Cochran Q test** | | | | | | | |
| method | Q | Q_df | Q_pval |  |  |  |  |
| MR Egger | 174.006098 | 124 | 0.002062682 |  |  |  |  |
| Inverse variance weighted | 177.4765208 | 125 | 0.001423379 |  |  |  |  |
| **MR-Egger regression analysis** | | | | | | | |
| egger_intercept | se | pval |  |  |  |  |  |
| -0.008201527 | 0.005215248 | 0.118358321 |  |  |  |  |  |
| IHD | **MR analyses** | | | | | | | |
| method | nsnp | b | se | pval | or | or_lci95 | or_uci95 |
| MR Egger | 126 | -0.003033405 | 0.085708255 | 0.971823907 | 0.996971192 | 0.842803382 | 1.179339782 |
| Weighted median | 126 | 0.00886048 | 0.060362115 | 0.883298752 | 1.008899851 | 0.896327639 | 1.13561031 |
| Inverse variance weighted | 126 | -0.184949528 | 0.048842929 | 0.000152711 | 0.831146232 | 0.755268723 | 0.914646719 |
| Simple mode | 126 | -0.294080031 | 0.177613588 | 0.100285056 | 0.745216849 | 0.526132255 | 1.055529567 |
| Weighted mode | 126 | 0.011393742 | 0.063713557 | 0.858362605 | 1.011458898 | 0.892717739 | 1.145993921 |
| **Cochran Q test** | | | | | | | |
| method | Q | Q_df | Q_pval |  |  |  |  |
| MR Egger | 279.9258769 | 124 | 4.58E-14 |  |  |  |  |
| Inverse variance weighted | 294.2887853 | 125 | 1.10E-15 |  |  |  |  |
| **MR-Egger regression analysis** | | | | | | | |
| egger_intercept | se | pval |  |  |  |  |  |
| -0.008522921 | 0.003333161 | 0.01176321 |  |  |  |  |  |
| HF | **MR analyses** | | | | | | | |
| method | nsnp | b | se | pval | or | or_lci95 | or_uci95 |
| MR Egger | 126 | -0.030078312 | 0.07877515 | 0.703244802 | 0.970369539 | 0.831538562 | 1.132379285 |
| Weighted median | 126 | -0.036049159 | 0.066097947 | 0.58548532 | 0.964592874 | 0.847384158 | 1.098013697 |
| Inverse variance weighted | 126 | -0.043803574 | 0.043801208 | 0.317284368 | 0.957141947 | 0.878399357 | 1.04294328 |
| Simple mode | 126 | 0.075347282 | 0.146938134 | 0.609008561 | 1.078258546 | 0.80843786 | 1.438133404 |
| Weighted mode | 126 | -0.026813943 | 0.06599964 | 0.685235922 | 0.973542359 | 0.855410989 | 1.107987549 |
| **Cochran Q test** | | | | | | | |
| method | Q | Q_df | Q_pval |  |  |  |  |
| MR Egger | 164.2868491 | 124 | 0.009004158 |  |  |  |  |
| Inverse variance weighted | 164.3452704 | 125 | 0.01050091 |  |  |  |  |
| **MR-Egger regression analysis** | | | | | | | |
| egger_intercept | se | pval |  |  |  |  |  |
| -0.000643802 | 0.003065893 | 0.834021423 |  |  |  |  |  |

**Table S9.** Genetic association estimates for the causal effect of selected mediators (LDL cholesterol) on CVD

| CHD | **MR analyses** | | | | | | | |
| --- | --- | --- | --- | --- | --- | --- | --- | --- |
| method | nsnp | b | se | pval | or | or_lci95 | or_uci95 |
| MR Egger | 18 | 0.381266795 | 0.158216259 | 0.028361392 | 1.464138178 | 1.073756156 | 1.996450118 |
| Weighted median | 18 | 0.404317223 | 0.065394449 | 6.30E-10 | 1.49827916 | 1.318037782 | 1.703168507 |
| Inverse variance weighted | 18 | 0.385511584 | 0.093963744 | 4.08E-05 | 1.470366345 | 1.223043772 | 1.767702218 |
| Simple mode | 18 | 0.345816971 | 0.173975443 | 0.063193667 | 1.413143945 | 1.004836762 | 1.987363405 |
| Weighted mode | 18 | 0.391912803 | 0.094355712 | 0.00066507 | 1.479808671 | 1.229952571 | 1.780421258 |
| **Cochran Q test** | | | | | | | |
| method | Q | Q_df | Q_pval |  |  |  |  |
| MR Egger | 152.9656605 | 16 | 2.03E-24 |  |  |  |  |
| Inverse variance weighted | 152.9766661 | 17 | 6.39E-24 |  |  |  |  |
| **MR-Egger regression analysis** | | | | | | | |
| egger_intercept | se | pval |  |  |  |  |  |
| 0.000846458 | 0.024947943 | 0.973353472 |  |  |  |  |  |
| HHD | **MR analyses** | | | | | | | |
| method | nsnp | b | se | pval | or | or_lci95 | or_uci95 |
| MR Egger | 18 | -0.112220144 | 0.093623087 | 0.248121675 | 0.89384746 | 0.74399468 | 1.073883058 |
| Weighted median | 18 | -0.089280306 | 0.077455547 | 0.249047871 | 0.914589173 | 0.785768406 | 1.064529126 |
| Inverse variance weighted | 18 | -0.047023561 | 0.057342478 | 0.412188977 | 0.954064918 | 0.852642594 | 1.067551487 |
| Simple mode | 18 | -0.194462984 | 0.137046122 | 0.173985382 | 0.823276652 | 0.629346448 | 1.076965554 |
| Weighted mode | 18 | -0.095481938 | 0.094194442 | 0.324951761 | 0.908934778 | 0.755705866 | 1.093232789 |
| **Cochran Q test** | | | | | | | |
| method | Q | Q_df | Q_pval |  |  |  |  |
| MR Egger | 13.63572699 | 16 | 0.625830978 |  |  |  |  |
| Inverse variance weighted | 14.41179041 | 17 | 0.637768758 |  |  |  |  |
| **MR-Egger regression analysis** | | | | | | | |
| egger_intercept | se | pval |  |  |  |  |  |
| 0.013056305 | 0.014820802 | 0.391389166 |  |  |  |  |  |
| IHD | **MR analyses** | | | | | | | |
| method | nsnp | b | se | pval | or | or_lci95 | or_uci95 |
| MR Egger | 18 | 0.358173595 | 0.148892143 | 0.028599186 | 1.430713964 | 1.068595314 | 1.915545034 |
| Weighted median | 18 | 0.41063947 | 0.063196008 | 8.15E-11 | 1.507781658 | 1.332124845 | 1.706600952 |
| Inverse variance weighted | 18 | 0.349662627 | 0.088426461 | 7.68E-05 | 1.418588875 | 1.192851624 | 1.687045023 |
| Simple mode | 18 | 0.47557846 | 0.150108437 | 0.005618553 | 1.608944638 | 1.198853787 | 2.159314901 |
| Weighted mode | 18 | 0.439305846 | 0.083109616 | 6.05E-05 | 1.551629775 | 1.318389609 | 1.826133142 |
| **Cochran Q test** | | | | | | | |
| method | Q | Q_df | Q_pval |  |  |  |  |
| MR Egger | 186.7350719 | 16 | 3.74E-31 |  |  |  |  |
| Inverse variance weighted | 186.7960518 | 17 | 1.27E-30 |  |  |  |  |
| **MR-Egger regression analysis** | | | | | | | |
| egger_intercept | se | pval |  |  |  |  |  |
| -0.001698805 | 0.023501914 | 0.943272027 |  |  |  |  |  |
| HF | **MR analyses** | | | | | | | |
| method | nsnp | b | se | pval | or | or_lci95 | or_uci95 |
| MR Egger | 18 | 0.079781681 | 0.0720911 | 0.28479469 | 1.083050592 | 0.940337078 | 1.247423517 |
| Weighted median | 18 | -0.106223397 | 0.05512174 | 0.053971029 | 0.899223742 | 0.807136882 | 1.001816861 |
| Inverse variance weighted | 18 | -0.00180036 | 0.045508545 | 0.968443181 | 0.99820126 | 0.913020351 | 1.091329183 |
| Simple mode | 18 | -0.133258244 | 0.113736776 | 0.257502463 | 0.875239038 | 0.700344918 | 1.093808712 |
| Weighted mode | 18 | -0.122467466 | 0.0677508 | 0.08839389 | 0.884734688 | 0.774715794 | 1.010377579 |
| **Cochran Q test** | | | | | | | |
| method | Q | Q_df | Q_pval |  |  |  |  |
| MR Egger | 25.81785887 | 16 | 0.056645568 |  |  |  |  |
| Inverse variance weighted | 29.12584279 | 17 | 0.033383227 |  |  |  |  |
| **MR-Egger regression analysis** | | | | | | | |
| egger_intercept | se | pval |  |  |  |  |  |
| -0.016319572 | 0.011397962 | 0.171447052 |  |  |  |  |  |

**Table S10.** Genetic association estimates for the causal effect of selected mediators (Isoleucine) on CVD

| CHD | **MR analyses** | | | | | | | |
| --- | --- | --- | --- | --- | --- | --- | --- | --- |
| method | nsnp | b | se | pval | or | or_lci95 | or_uci95 |
| MR Egger | 21 | -0.310694164 | 0.201921085 | 0.140367998 | 0.732938001 | 0.493387954 | 1.088794545 |
| Weighted median | 21 | 0.001155241 | 0.111154359 | 0.991707638 | 1.001155908 | 0.805165605 | 1.244853415 |
| Inverse variance weighted | 21 | 0.04022938 | 0.100139405 | 0.687879975 | 1.041049543 | 0.855521671 | 1.266810868 |
| Simple mode | 21 | 0.128313301 | 0.204385969 | 0.537238662 | 1.136909141 | 0.761638536 | 1.69708114 |
| Weighted mode | 18 | 0.391912803 | 0.094355712 | 0.00066507 | 1.479808671 | 1.229952571 | 1.780421258 |
| **Cochran Q test** | | | | | | | |
| method | Q | Q_df | Q_pval |  |  |  |  |
| MR Egger | 29.08810612 | 19 | 0.064611834 |  |  |  |  |
| Inverse variance weighted | 34.98075217 | 20 | 0.020207028 |  |  |  |  |
| **MR-Egger regression analysis** | | | | | | | |
| egger_intercept | se | pval |  |  |  |  |  |
| 0.026861131 | 0.013691469 | 0.064593559 |  |  |  |  |  |
| HHD | **MR analyses** | | | | | | | |
| method | nsnp | b | se | pval | or | or_lci95 | or_uci95 |
| MR Egger | 21 | -0.35391177 | 0.336141153 | 0.305608631 | 0.701936897 | 0.363219324 | 1.35652311 |
| Weighted median | 21 | -0.119672535 | 0.19548913 | 0.540425442 | 0.887210919 | 0.60481586 | 1.301459283 |
| Inverse variance weighted | 21 | -0.068549736 | 0.155827747 | 0.660004378 | 0.933747019 | 0.687996093 | 1.267279718 |
| Simple mode | 21 | -0.126650099 | 0.363417884 | 0.731108555 | 0.881041896 | 0.432164424 | 1.79615623 |
| Weighted mode | 21 | -0.242328992 | 0.378188273 | 0.528951078 | 0.784797943 | 0.373970633 | 1.646941651 |
| **Cochran Q test** | | | | | | | |
| method | Q | Q_df | Q_pval |  |  |  |  |
| MR Egger | 23.97030819 | 19 | 0.197293763 |  |  |  |  |
| Inverse variance weighted | 25.1297007 | 20 | 0.196514062 |  |  |  |  |
| **MR-Egger regression analysis** | | | | | | | |
| egger_intercept | se | pval |  |  |  |  |  |
| 0.021884462 | 0.022828671 | 0.349781308 |  |  |  |  |  |
| IHD | **MR analyses** | | | | | | | |
| method | nsnp | b | se | pval | or | or_lci95 | or_uci95 |
| MR Egger | 21 | -0.211449048 | 0.164880358 | 0.215114768 | 0.809410521 | 0.58589508 | 1.118195757 |
| Weighted median | 21 | 0.046099206 | 0.093346661 | 0.621412439 | 1.047178293 | 0.872092092 | 1.257415801 |
| Inverse variance weighted | 21 | -0.008604564 | 0.078305807 | 0.91250128 | 0.991432349 | 0.850369816 | 1.155894864 |
| Simple mode | 21 | 0.117711686 | 0.174568498 | 0.507839867 | 1.124919734 | 0.798961459 | 1.583861642 |
| Weighted mode | 21 | 0.053975666 | 0.142536186 | 0.708915186 | 1.055458918 | 0.79820066 | 1.395630928 |
| **Cochran Q test** | | | | | | | |
| method | Q | Q_df | Q_pval |  |  |  |  |
| MR Egger | 26.7304937 | 19 | 0.111088946 |  |  |  |  |
| Inverse variance weighted | 29.44486978 | 20 | 0.079362042 |  |  |  |  |
| **MR-Egger regression analysis** | | | | | | | |
| egger_intercept | se | pval |  |  |  |  |  |
| 0.015541246 | 0.011188645 | 0.18089408 |  |  |  |  |  |
| HF | **MR analyses** | | | | | | | |
| method | nsnp | b | se | pval | or | or_lci95 | or_uci95 |
| MR Egger | 21 | -0.25032646 | 0.181783614 | 0.184503629 | 0.778546577 | 0.545189225 | 1.111787881 |
| Weighted median | 21 | -0.01795716 | 0.11492903 | 0.875839399 | 0.982203109 | 0.784100515 | 1.230356221 |
| Inverse variance weighted | 21 | -0.032336457 | 0.084263365 | 0.701160311 | 0.968180776 | 0.820786171 | 1.142044113 |
| Simple mode | 21 | -0.030249973 | 0.201863518 | 0.882381038 | 0.970202979 | 0.653180045 | 1.441093963 |
| Weighted mode | 21 | -0.007916685 | 0.192173871 | 0.967548581 | 0.99211457 | 0.680738207 | 1.445917548 |
| **Cochran Q test** | | | | | | | |
| method | Q | Q_df | Q_pval |  |  |  |  |
| MR Egger | 12.64973657 | 19 | 0.856009422 |  |  |  |  |
| Inverse variance weighted | 14.4812918 | 20 | 0.805279558 |  |  |  |  |
| **MR-Egger regression analysis** | | | | | | | |
| egger_intercept | se | pval |  |  |  |  |  |
| 0.016677452 | 0.012323092 | 0.191827374 |  |  |  |  |  |

**Table S11.** Genetic association estimates for the causal effect of selected mediators (Phenylalanine) on CVD

| CHD | **MR analyses** | | | | | | | |
| --- | --- | --- | --- | --- | --- | --- | --- | --- |
| method | nsnp | b | se | pval | or | or_lci95 | or_uci95 |
| MR Egger | 68 | 0.04218712 | 0.062907245 | 0.50480002 | 1.043089643 | 0.92209126 | 1.17996564 |
| Weighted median | 68 | -0.010876034 | 0.052301667 | 0.835269469 | 0.989182896 | 0.892804809 | 1.095964978 |
| Inverse variance weighted | 68 | -0.001554509 | 0.034843367 | 0.964414832 | 0.998446699 | 0.932536013 | 1.069015885 |
| Simple mode | 68 | -0.050919337 | 0.085064452 | 0.551460018 | 0.950355326 | 0.804410424 | 1.122779143 |
| Weighted mode | 68 | -0.019326392 | 0.062754474 | 0.759061808 | 0.980859166 | 0.867339186 | 1.109236984 |
| **Cochran Q test** | | | | | | | |
| method | Q | Q_df | Q_pval |  |  |  |  |
| MR Egger | 60.7553242 | 66 | 0.659359315 |  |  |  |  |
| Inverse variance weighted | 61.4527897 | 67 | 0.668244379 |  |  |  |  |
| **MR-Egger regression analysis** | | | | | | | |
| egger_intercept | se | pval |  |  |  |  |  |
| -0.006533591 | 0.007823311 | 0.40664966 |  |  |  |  |  |
| HHD | **MR analyses** | | | | | | | |
| method | nsnp | b | se | pval | or | or_lci95 | or_uci95 |
| MR Egger | 68 | -0.088070264 | 0.140876952 | 0.534023371 | 0.915696534 | 0.694759811 | 1.206892122 |
| Weighted median | 68 | -0.020510926 | 0.101708338 | 0.840179289 | 0.979697992 | 0.802631745 | 1.195826307 |
| Inverse variance weighted | 68 | -0.079746226 | 0.07744275 | 0.303130077 | 0.923350639 | 0.79331571 | 1.074700011 |
| Simple mode | 68 | 0.050759465 | 0.192622144 | 0.792959872 | 1.052069803 | 0.721242444 | 1.534644668 |
| Weighted mode | 68 | -0.021313846 | 0.119735871 | 0.859254443 | 0.978911689 | 0.774144946 | 1.237840665 |
| **Cochran Q test** | | | | | | | |
| method | Q | Q_df | Q_pval |  |  |  |  |
| MR Egger | 97.46925001 | 66 | 0.007117869 |  |  |  |  |
| Inverse variance weighted | 97.47668739 | 67 | 0.008888454 |  |  |  |  |
| **MR-Egger regression analysis** | | | | | | | |
| egger_intercept | se | pval |  |  |  |  |  |
| 0.001242908 | 0.017514225 | 0.943639717 |  |  |  |  |  |
| IHD | **MR analyses** | | | | | | | |
| method | nsnp | b | se | pval | or | or_lci95 | or_uci95 |
| MR Egger | 68 | 0.043038123 | 0.053578368 | 0.424699736 | 1.043977693 | 0.939905935 | 1.159572872 |
| Weighted median | 68 | -0.003767317 | 0.042837098 | 0.929920234 | 0.99623977 | 0.916009971 | 1.08349659 |
| Inverse variance weighted | 68 | -0.00160498 | 0.029670711 | 0.956860999 | 0.998396307 | 0.941990986 | 1.058179113 |
| Simple mode | 68 | 0.022501582 | 0.076035493 | 0.768194833 | 1.022756652 | 0.881149492 | 1.187121119 |
| Weighted mode | 68 | 0.022501582 | 0.055788738 | 0.687985678 | 1.022756652 | 0.916819793 | 1.140934323 |
| **Cochran Q test** | | | | | | | |
| method | Q | Q_df | Q_pval |  |  |  |  |
| MR Egger | 55.61144905 | 66 | 0.815322107 |  |  |  |  |
| Inverse variance weighted | 56.61281379 | 67 | 0.813262196 |  |  |  |  |
| **MR-Egger regression analysis** | | | | | | | |
| egger_intercept | se | pval |  |  |  |  |  |
| -0.006673708 | 0.006669159 | 0.320635293 |  |  |  |  |  |
| HF | **MR analyses** | | | | | | | |
| method | nsnp | b | se | pval | or | or_lci95 | or_uci95 |
| MR Egger | 68 | -0.079763696 | 0.072632985 | 0.276118465 | 0.923334508 | 0.800815779 | 1.064597671 |
| Weighted median | 68 | -0.06131159 | 0.062288561 | 0.32496046 | 0.940530135 | 0.832437472 | 1.062658715 |
| Inverse variance weighted | 68 | -0.011723675 | 0.040315406 | 0.771205145 | 0.98834478 | 0.913253418 | 1.069610454 |
| Simple mode | 68 | -0.156587037 | 0.125722346 | 0.217286626 | 0.855057093 | 0.668310204 | 1.093986935 |
| Weighted mode | 68 | -0.058438339 | 0.075217994 | 0.439940587 | 0.9432364 | 0.813942457 | 1.093068555 |
| **Cochran Q test** | | | | | | | |
| method | Q | Q_df | Q_pval |  |  |  |  |
| MR Egger | 71.40754491 | 66 | 0.302900697 |  |  |  |  |
| Inverse variance weighted | 72.77730986 | 67 | 0.29368554 |  |  |  |  |
| **MR-Egger regression analysis** | | | | | | | |
| egger_intercept | se | pval |  |  |  |  |  |
| 0.010182996 | 0.009050084 | 0.264586983 |  |  |  |  |  |

**Table S12.** Genetic association estimates for the causal effect of selected mediators (Alanine) on CVD

| CHD | **MR analyses** | | | | | | | |
| --- | --- | --- | --- | --- | --- | --- | --- | --- |
| method | nsnp | b | se | pval | or | or_lci95 | or_uci95 |
| MR Egger | 7 | -0.252721179 | 0.314066389 | 0.457546344 | 0.776684407 | 0.419668023 | 1.437418711 |
| Weighted median | 7 | 0.149746484 | 0.159577645 | 0.348042676 | 1.161539737 | 0.849569355 | 1.58806877 |
| Inverse variance weighted | 7 | 0.114905138 | 0.121809598 | 0.345518471 | 1.12176702 | 0.883519715 | 1.424259386 |
| Simple mode | 7 | 0.247727138 | 0.20358429 | 0.269357355 | 1.281110318 | 0.859591441 | 1.909329907 |
| Weighted mode | 7 | 0.168470872 | 0.2117463 | 0.456562926 | 1.183493753 | 0.78149082 | 1.792289082 |
| **Cochran Q test** | | | | | | | |
| method | Q | Q_df | Q_pval |  |  |  |  |
| MR Egger | 1.906652596 | 5 | 0.861904815 |  |  |  |  |
| Inverse variance weighted | 3.519408182 | 6 | 0.741385756 |  |  |  |  |
| **MR-Egger regression analysis** | | | | | | | |
| egger_intercept | se | pval |  |  |  |  |  |
| 0.021060391 | 0.016583727 | 0.25999549 |  |  |  |  |  |
| HHD | **MR analyses** | | | | | | | |
| method | nsnp | b | se | pval | or | or_lci95 | or_uci95 |
| MR Egger | 7 | 0.036864575 | 0.579966597 | 0.95178087 | 1.037552501 | 0.332914375 | 3.233609825 |
| Weighted median | 7 | 0.023026535 | 0.299455395 | 0.938707308 | 1.023293692 | 0.56898225 | 1.840356145 |
| Inverse variance weighted | 7 | 0.122939904 | 0.224277263 | 0.583581801 | 1.130816461 | 0.728590429 | 1.755095618 |
| Simple mode | 7 | -0.153196478 | 0.440338058 | 0.739790965 | 0.857961135 | 0.361946426 | 2.033718959 |
| Weighted mode | 7 | 0.109403563 | 0.403189663 | 0.795219782 | 1.115612479 | 0.506187474 | 2.458755438 |
| **Cochran Q test** | | | | | | | |
| method | Q | Q_df | Q_pval |  |  |  |  |
| MR Egger | 4.188471986 | 5 | 0.522612123 |  |  |  |  |
| Inverse variance weighted | 4.214371927 | 6 | 0.647691363 |  |  |  |  |
| **MR-Egger regression analysis** | | | | | | | |
| egger_intercept | se | pval |  |  |  |  |  |
| 0.004918699 | 0.030563346 | 0.878445308 |  |  |  |  |  |
| IHD | **MR analyses** | | | | | | | |
| method | nsnp | b | se | pval | or | or_lci95 | or_uci95 |
| MR Egger | 7 | 0.155077424 | 0.267374385 | 0.587067621 | 1.167748369 | 0.691441749 | 1.972163607 |
| Weighted median | 7 | 0.168656646 | 0.131215568 | 0.198673425 | 1.183713636 | 0.915279434 | 1.53087453 |
| Inverse variance weighted | 7 | 0.162654578 | 0.103724261 | 0.116847529 | 1.176630186 | 0.960169955 | 1.441889103 |
| Simple mode | 7 | 0.201858916 | 0.170167792 | 0.280368788 | 1.223675355 | 0.876630273 | 1.708110501 |
| Weighted mode | 7 | 0.197414272 | 0.154018582 | 0.247227771 | 1.218248622 | 0.900808894 | 1.647552234 |
| **Cochran Q test** | | | | | | | |
| method | Q | Q_df | Q_pval |  |  |  |  |
| MR Egger | 1.477145684 | 5 | 0.915692032 |  |  |  |  |
| Inverse variance weighted | 1.478091065 | 6 | 0.960936587 |  |  |  |  |
| **MR-Egger regression analysis** | | | | | | | |
| egger_intercept | se | pval |  |  |  |  |  |
| 0.000434039 | 0.014116457 | 0.97666085 |  |  |  |  |  |
| HF | **MR analyses** | | | | | | | |
| method | nsnp | b | se | pval | or | or_lci95 | or_uci95 |
| MR Egger | 7 | -0.537193336 | 0.349144384 | 0.184518469 | 0.584386128 | 0.29478284 | 1.158504161 |
| Weighted median | 7 | -0.120455642 | 0.187885707 | 0.521450402 | 0.886516411 | 0.613416194 | 1.281204107 |
| Inverse variance weighted | 7 | -0.062172878 | 0.135496644 | 0.646340598 | 0.939720416 | 0.720545799 | 1.225563261 |
| Simple mode | 7 | -0.358387315 | 0.285648091 | 0.256265944 | 0.698802366 | 0.399214037 | 1.223215372 |
| Weighted mode | 7 | -0.180937009 | 0.230910509 | 0.463086343 | 0.834487923 | 0.530719521 | 1.312124514 |
| **Cochran Q test** | | | | | | | |
| method | Q | Q_df | Q_pval |  |  |  |  |
| MR Egger | 3.583689868 | 5 | 0.610763838 |  |  |  |  |
| Inverse variance weighted | 5.762935315 | 6 | 0.450263371 |  |  |  |  |
| **MR-Egger regression analysis** | | | | | | | |
| egger_intercept | se | pval |  |  |  |  |  |
| 0.027222037 | 0.018440282 | 0.199912086 |  |  |  |  |  |

**Table S13.** Genetic association estimates for the causal effect of selected mediators (Glutamine) on CVD

| CHD | **MR analyses** | | | | | | | |
| --- | --- | --- | --- | --- | --- | --- | --- | --- |
| method | nsnp | b | se | pval | or | or_lci95 | or_uci95 |
| MR Egger | 112 | 0.041044027 | 0.073642506 | 0.578426473 | 1.041897976 | 0.901860629 | 1.203679768 |
| Weighted median | 112 | -0.031097592 | 0.063243309 | 0.622921853 | 0.969380964 | 0.856368523 | 1.097307326 |
| Inverse variance weighted | 112 | 0.001618058 | 0.039761722 | 0.967539952 | 1.001619368 | 0.926524382 | 1.082800817 |
| Simple mode | 112 | 0.009514329 | 0.130298482 | 0.941922022 | 1.009559734 | 0.782023338 | 1.303299796 |
| Weighted mode | 112 | -0.033447438 | 0.093167729 | 0.72027527 | 0.967105742 | 0.805690031 | 1.160860234 |
| **Cochran Q test** | | | | | | | |
| method | Q | Q_df | Q_pval |  |  |  |  |
| MR Egger | 109.7725285 | 110 | 0.488182191 |  |  |  |  |
| Inverse variance weighted | 110.1770877 | 111 | 0.504219416 |  |  |  |  |
| **MR-Egger regression analysis** | | | | | | | |
| egger_intercept | se | pval |  |  |  |  |  |
| -0.004308624 | 0.006774037 | 0.526065247 |  |  |  |  |  |
| HHD | **MR analyses** | | | | | | | |
| method | nsnp | b | se | pval | or | or_lci95 | or_uci95 |
| MR Egger | 112 | 0.127295416 | 0.135543049 | 0.349710779 | 1.135752487 | 0.87077735 | 1.481358826 |
| Weighted median | 112 | 0.090030095 | 0.11141707 | 0.419064217 | 1.094207214 | 0.879547805 | 1.361255659 |
| Inverse variance weighted | 112 | 0.090640234 | 0.073190198 | 0.215560225 | 1.094875035 | 0.948557798 | 1.263762044 |
| Simple mode | 112 | 0.21899361 | 0.229561105 | 0.342173452 | 1.244823322 | 0.793782205 | 1.952153994 |
| Weighted mode | 112 | 0.06417408 | 0.15884125 | 0.686979799 | 1.066278001 | 0.781019807 | 1.455723357 |
| **Cochran Q test** | | | | | | | |
| method | Q | Q_df | Q_pval |  |  |  |  |
| MR Egger | 99.74905884 | 110 | 0.748096036 |  |  |  |  |
| Inverse variance weighted | 99.85229285 | 111 | 0.767201351 |  |  |  |  |
| **MR-Egger regression analysis** | | | | | | | |
| egger_intercept | se | pval |  |  |  |  |  |
| -0.004005707 | 0.012467166 | 0.748592365 |  |  |  |  |  |
| IHD | **MR analyses** | | | | | | | |
| method | nsnp | b | se | pval | or | or_lci95 | or_uci95 |
| MR Egger | 112 | 0.06690341 | 0.062914505 | 0.289928589 | 1.069192199 | 0.945152471 | 1.209510629 |
| Weighted median | 112 | 0.038186082 | 0.051669453 | 0.459879304 | 1.03892454 | 0.938862685 | 1.14965076 |
| Inverse variance weighted | 112 | 0.043835213 | 0.033875615 | 0.195663716 | 1.04481017 | 0.977691604 | 1.116536428 |
| Simple mode | 112 | 0.087249999 | 0.095841683 | 0.364607706 | 1.091169437 | 0.904294951 | 1.316661936 |
| Weighted mode | 112 | 0.050503183 | 0.061980429 | 0.416917483 | 1.051800211 | 0.931481957 | 1.18765981 |
| **Cochran Q test** | | | | | | | |
| method | Q | Q_df | Q_pval |  |  |  |  |
| MR Egger | 110.5010285 | 110 | 0.468644632 |  |  |  |  |
| Inverse variance weighted | 110.6915738 | 111 | 0.490404801 |  |  |  |  |
| **MR-Egger regression analysis** | | | | | | | |
| egger_intercept | se | pval |  |  |  |  |  |
| -0.002520929 | 0.005788263 | 0.664035369 |  |  |  |  |  |
| HF | **MR analyses** | | | | | | | |
| method | nsnp | b | se | pval | or | or_lci95 | or_uci95 |
| MR Egger | 112 | -0.003334108 | 0.084828585 | 0.968719215 | 0.996671444 | 0.844003924 | 1.176954205 |
| Weighted median | 112 | 0.050829855 | 0.071310066 | 0.475969183 | 1.052143861 | 0.91490241 | 1.209972443 |
| Inverse variance weighted | 112 | 0.011038168 | 0.045545416 | 0.808504952 | 1.011099313 | 0.924750925 | 1.105510461 |
| Simple mode | 112 | 0.108955723 | 0.157161689 | 0.489587271 | 1.115112976 | 0.81948336 | 1.517391334 |
| Weighted mode | 112 | 0.018353544 | 0.102436034 | 0.858130248 | 1.018523005 | 0.833250399 | 1.244990838 |
| **Cochran Q test** | | | | | | | |
| method | Q | Q_df | Q_pval |  |  |  |  |
| MR Egger | 117.269313 | 110 | 0.299992168 |  |  |  |  |
| Inverse variance weighted | 117.3124631 | 111 | 0.322598432 |  |  |  |  |
| **MR-Egger regression analysis** | | | | | | | |
| egger_intercept | se | pval |  |  |  |  |  |
| 0.001569596 | 0.007801765 | 0.840925657 |  |  |  |  |  |

**Table S14.** Multivariable MR estimates for the causal effect of Total cholesterol on CVD with adjustment for ER+ BC

| CHD | **MR analyses** | | | | | | | |
| --- | --- | --- | --- | --- | --- | --- | --- | --- |
| Method | Variable | b | se | pval | or | or_lci95 | or_uci95 |
| IVW | Total cholesterol | 0.514052705 | 0.071176789 | 5.12E-13 | 1.672053823 | 1.454331286 | 1.922370792 |
| ER+ Breast cancer | -0.011438386 | 0.038815704 | 0.768234904 | 0.988626783 | 0.916203145 | 1.066775335 |
| HHD | **MR analyses** | | | | | | | |
| Method | Variable | b | se | pval | or | or_lci95 | or_uci95 |
| IVW | Total cholesterol | -0.046845496 | 0.073189876 | 0.522137289 | 0.95423482 | 0.826713025 | 1.101427054 |
| ER+ Breast cancer | 0.028490053 | 0.040015256 | 0.476477296 | 1.028899777 | 0.951286644 | 1.112845174 |
| IHD | **MR analyses** | | | | | | | |
| Method | Variable | b | se | pval | or | or_lci95 | or_uci95 |
| IVW | Total cholesterol levels | 0.477517966 | 0.064162414 | 9.89E-14 | 1.612068224 | 1.421566787 | 1.828098392 |
| ER+ Breast cancer | -0.007308541 | 0.035017432 | 0.83467346 | 0.992718102 | 0.926869307 | 1.063245079 |
| HF | **MR analyses** | | | | | | | |
| Method | Variable | b | se | pval | or | or_lci95 | or_uci95 |
| IVW | Total cholesterol | -0.012456874 | 0.04673702 | 0.78983013 | 0.987620391 | 0.901169934 | 1.082364159 |
| ER+ Breast cancer | 0.033304979 | 0.025500281 | 0.191531056 | 1.033865799 | 0.983462696 | 1.086852093 |

**Table S15.** Multivariable MR estimates for the causal effect of HDL cholesterol on CVD with adjustment for ER+ BC

| CHD | **MR analyses** | | | | | | | |
| --- | --- | --- | --- | --- | --- | --- | --- | --- |
| Method | Variable | b | se | pval | or | or_lci95 | or_uci95 |
| IVW | HDL cholesterol | -0.18617419 | 0.05754861 | 0.001216099 | 0.830128982 | 0.741582054 | 0.929248657 |
| ER+ Breast cancer | 0.032098937 | 0.036186202 | 0.375052487 | 1.032619664 | 0.96191805 | 1.108517894 |
| HHD | **MR analyses** | | | | | | | |
| Method | Variable | b | se | pval | or | or_lci95 | or_uci95 |
| IVW | HDL cholesterol | -0.029948918 | 0.070812865 | 0.672345996 | 0.970495107 | 0.844726702 | 1.114988731 |
| ER+ Breast cancer | 0.055470708 | 0.04450364 | 0.212606273 | 1.057038054 | 0.968742514 | 1.153381245 |
| IHD | **MR analyses** | | | | | | | |
| Method | Variable | b | se | pval | or | or_lci95 | or_uci95 |
| IVW | HDL cholesterol | -0.192059432 | 0.051670227 | 0.000201584 | 0.82525782 | 0.745773699 | 0.913213312 |
| ER+ Breast cancer | 0.037042918 | 0.032443977 | 0.25355786 | 1.037737557 | 0.973802004 | 1.105870837 |
| HF | **MR analyses** | | | | | | | |
| Method | Variable | b | se | pval | or | or_lci95 | or_uci95 |
| IVW | HDL cholesterol | -0.051638317 | 0.043189862 | 0.231848014 | 0.949672285 | 0.872589155 | 1.033564816 |
| ER+ Breast cancer | 0.075157738 | 0.027032648 | 0.005431572 | 1.078054188 | 1.022421412 | 1.136714096 |

**Table S16.** Multivariable MR estimates for the causal effect of LDL cholesterol on CVD with adjustment for ER+ BC

| CHD | **MR analyses** | | | | | | | |
| --- | --- | --- | --- | --- | --- | --- | --- | --- |
| Method | Variable | b | se | pval | or | or_lci95 | or_uci95 |
| IVW | LDL cholesterol | 0.598670036 | 0.113779738 | 1.43E-07 | 1.81969706 | 1.455954574 | 2.274313669 |
| ER+ Breast cancer | 0.087593461 | 0.070967743 | 0.217101764 | 1.091544276 | 0.9498005 | 1.254441229 |
| HHD | **MR analyses** | | | | | | | |
| Method | Variable | b | se | pval | or | or_lci95 | or_uci95 |
| IVW | LDL cholesterol | -0.095264058 | 0.073255569 | 0.193452141 | 0.909132839 | 0.787536963 | 1.049503144 |
| ER+ Breast cancer | 0.03941573 | 0.046012335 | 0.391647202 | 1.040202837 | 0.950498736 | 1.138372837 |
| IHD | **MR analyses** | | | | | | | |
| Method | Variable | b | se | pval | or | or_lci95 | or_uci95 |
| IVW | LDL cholesterol | 0.572818814 | 0.097075955 | 3.62E-09 | 1.773258499 | 1.466018087 | 2.144888751 |
| ER+ Breast cancer | 0.086528403 | 0.060651678 | 0.153682295 | 1.090382337 | 0.968168743 | 1.228023162 |
| HF | **MR analyses** | | | | | | | |
| Method | Variable | b | se | pval | or | or_lci95 | or_uci95 |
| IVW | LDL cholesterol | -0.009477294 | 0.08032516 | 0.906078262 | 0.990567474 | 0.846271873 | 1.159466541 |
| ER+ Breast cancer | 0.082636376 | 0.050252125 | 0.100086288 | 1.086146788 | 0.984267283 | 1.198571633 |

**Supplementary Figures**

**Figure S1.** Forrest plot of the causal effect of ER- BC on CVD


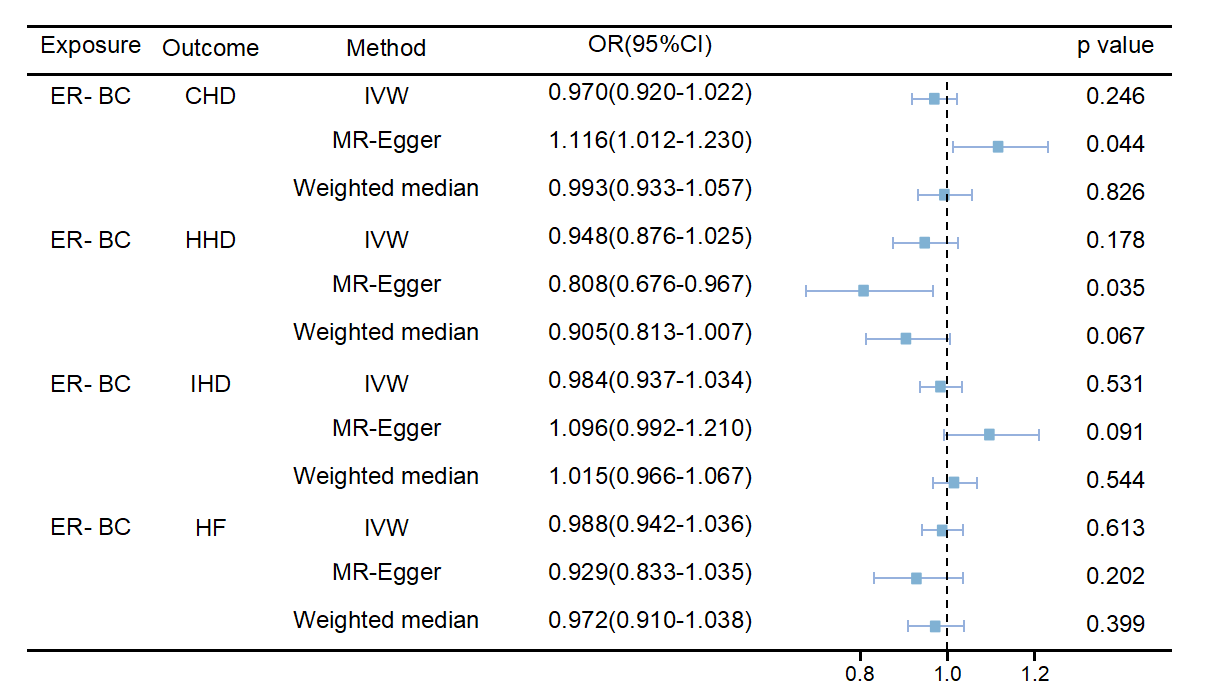


CHD, coronary heart disease; HHD, hypertensive heart disease; IHD, ischaemic heart disease; HF, heart failure

**Figure S2.** Leave-one-out analysis for MR examining the effect of overall BC on CHD

**
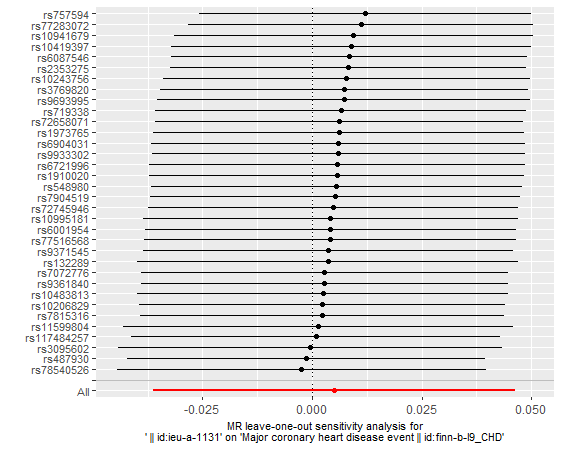
**

**Figure S3.** Scatter plot for MR examining the effect of overall BC on CHD

**
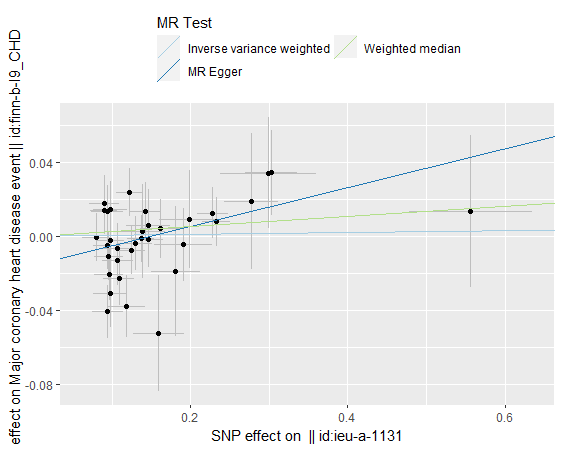
**

**Figure S4.** Funnel plot for MR examining the effect of overall BC on CHD

**
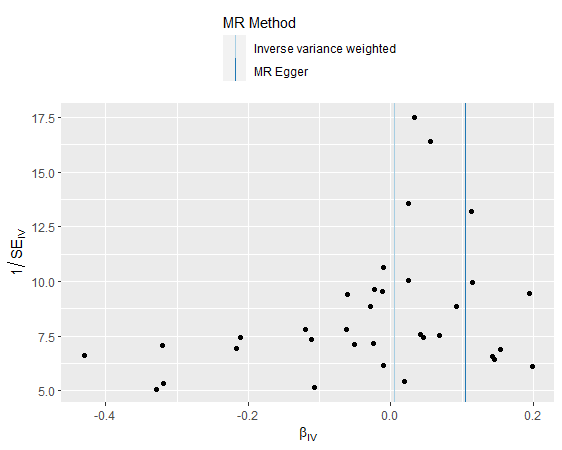
**

**Figure S5.** Leave-one-out analysis for MR examining the effect of overall BC on HHD

**
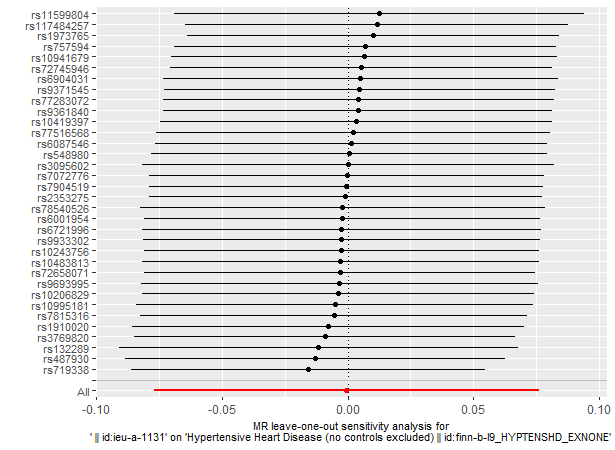
**

**Figure S6.** Scatter plot for MR examining the effect of overall BC on HHD

**
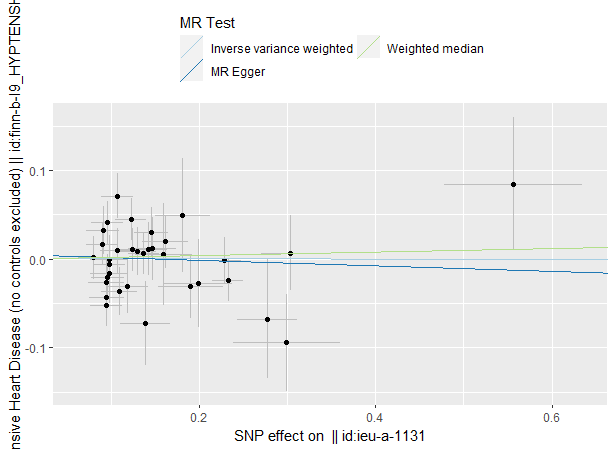
**

**Figure S7.** Funnel plot for MR examining the effect of overall BC on HHD

**
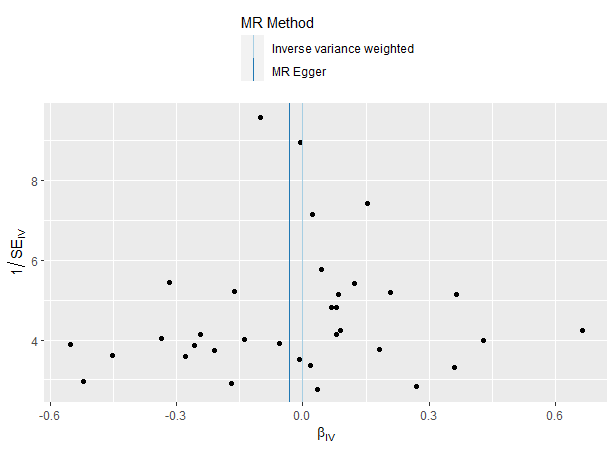
**

**Figure S8.** Leave-one-out analysis for MR examining the effect of overall BC on IHD


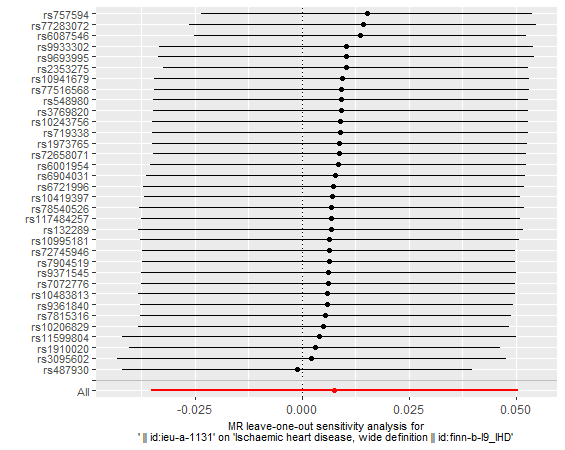


**Figure S9.** Scatter plot for MR examining the effect of overall BC on IHD


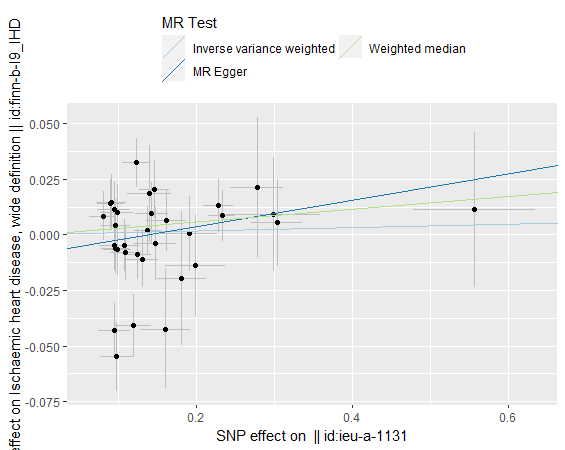


**Figure S10.** Funnel plot for MR examining the effect of overall BC on IHD


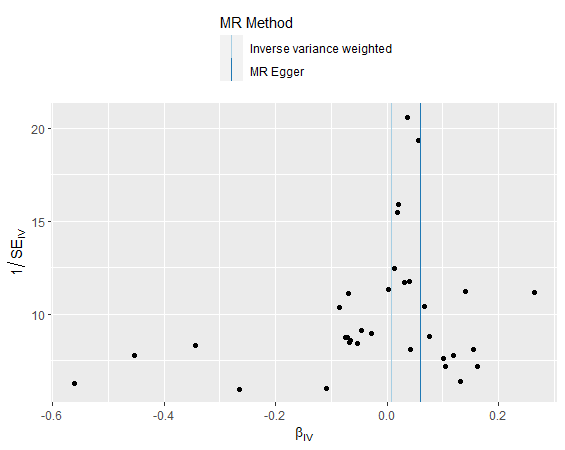


**Figure S11.** Leave-one-out analysis for MR examining the effect of overall BC on HF


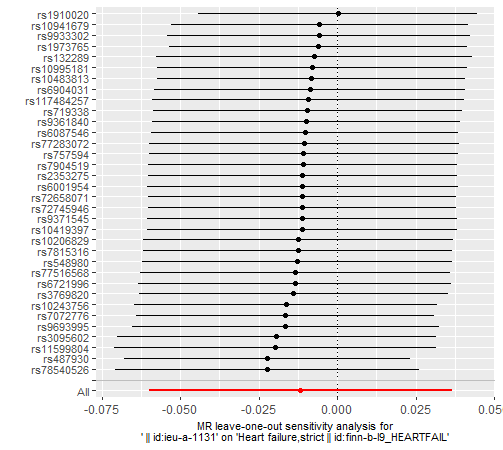


**Figure S12.** Scatter plot for MR examining the effect of overall BC on HF


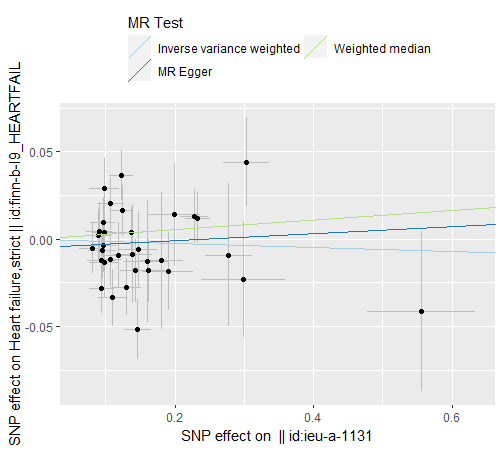


**Figure S13.** Funnel plot for MR examining the effect of overall BC on HF


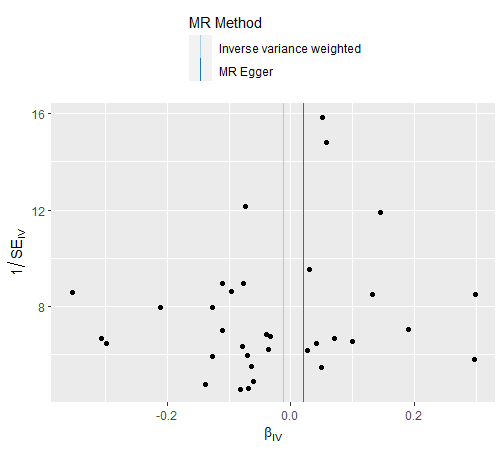


**Figure S14.** Leave-one-out analysis for MR examining the effect of ER+ BC on CHD


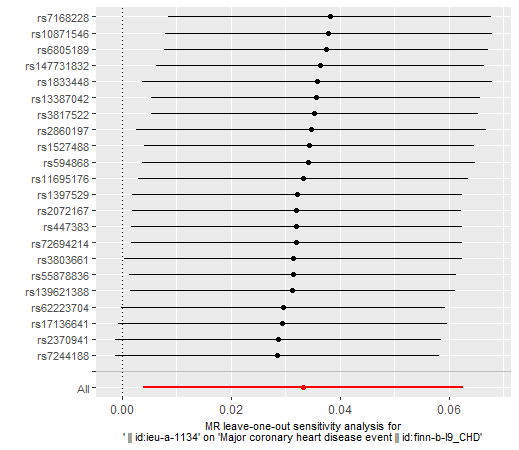


**Figure S15.** Scatter plot for MR examining the effect of ER+ BC on CHD


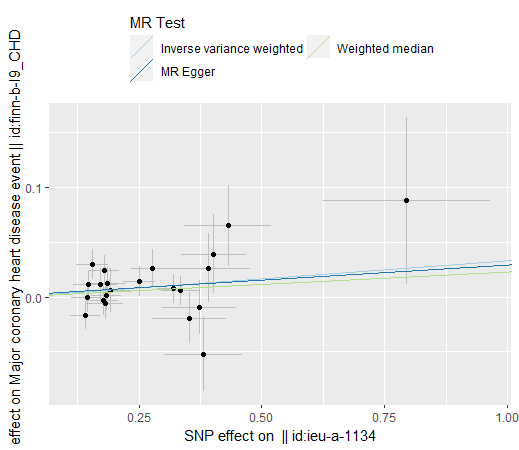


**Figure S16.** Funnel plot for MR examining the effect of ER+ BC on CHD


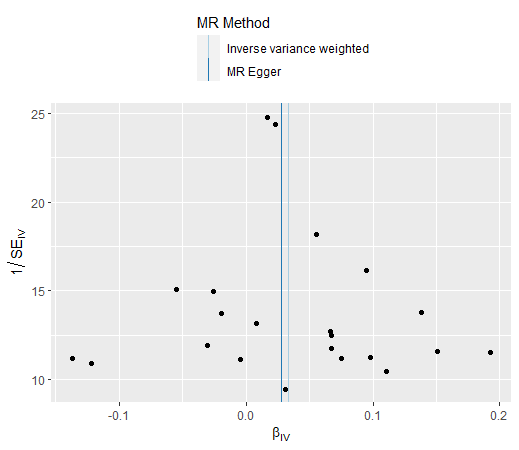


**Figure S17.** Leave-one-out analysis for MR examining the effect of ER+ BC on HHD


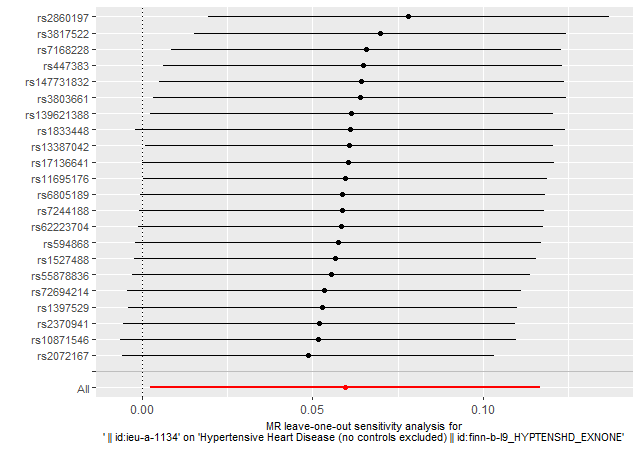


**Figure S18.** Scatter plot for MR examining the effect of ER+ BC on HHD


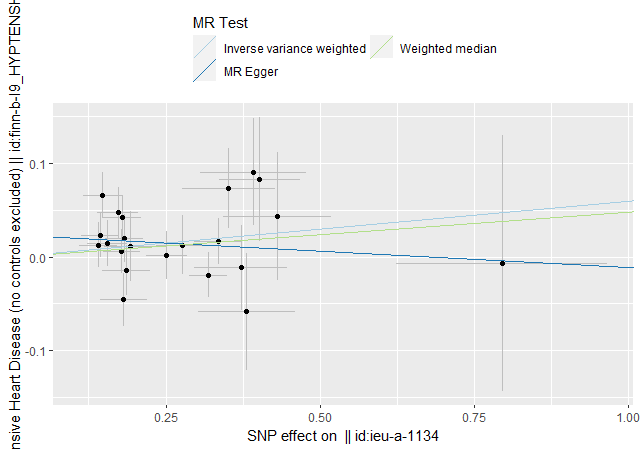


**Figure S19.** Funnel plot for MR examining the effect of ER+ BC on HHD


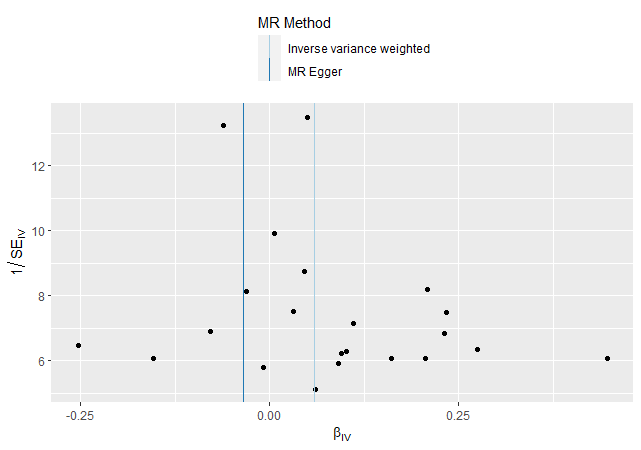


**Figure S20.** Leave-one-out analysis for MR examining the effect of ER+ BC on IHD


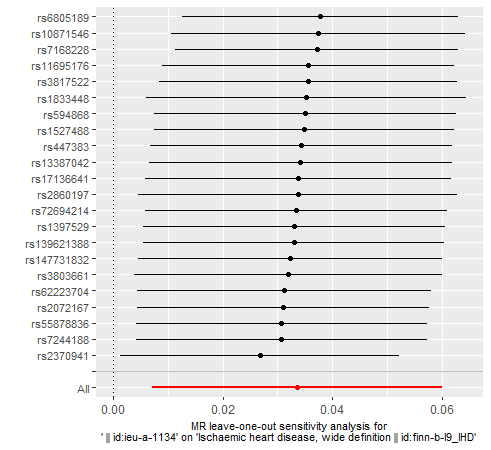


**Figure S21.** Scatter plot for MR examining the effect of ER+ BC on IHD


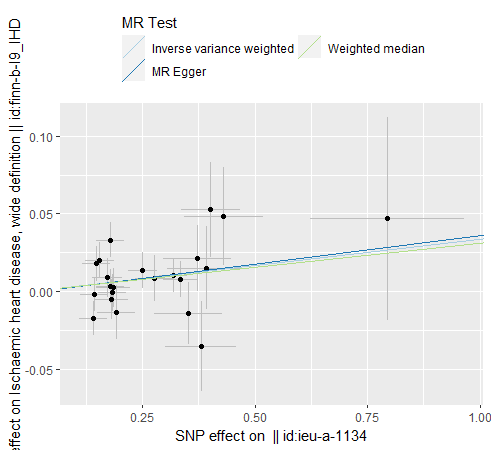


**Figure S22.** Funnel plot for MR examining the effect of ER+ BC on IHD


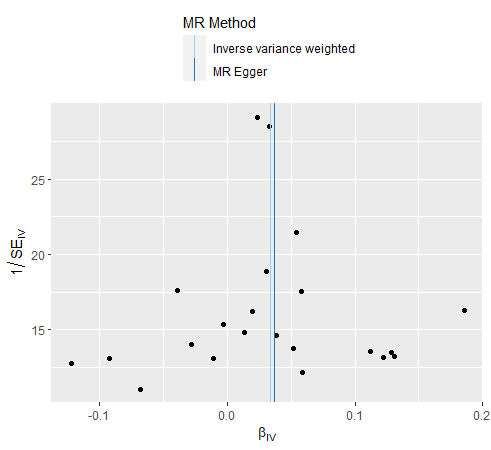


**Figure S23.** Leave-one-out analysis for MR examining the effect of ER+ BC on HF


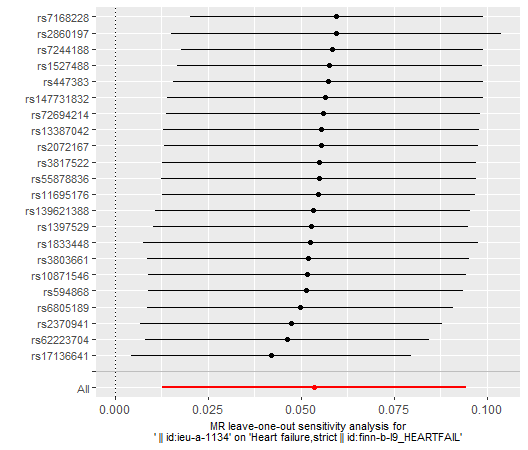


**Figure S24.** Scatter plot for MR examining the effect of ER+ BC on HF


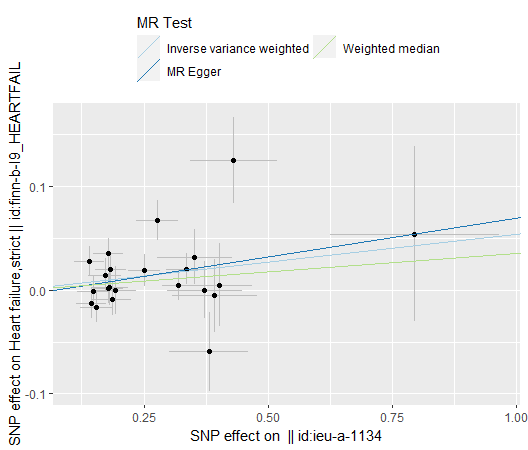


**Figure S25.** Funnel plot for MR examining the effect of ER+ BC on HF


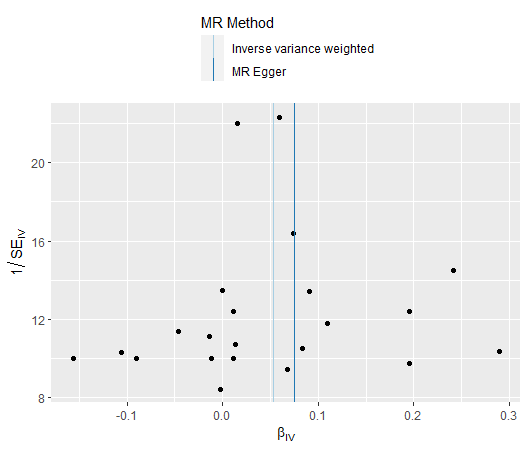


**Figure S26.** Leave-one-out analysis for MR examining the effect of ER- BC on CHD

**
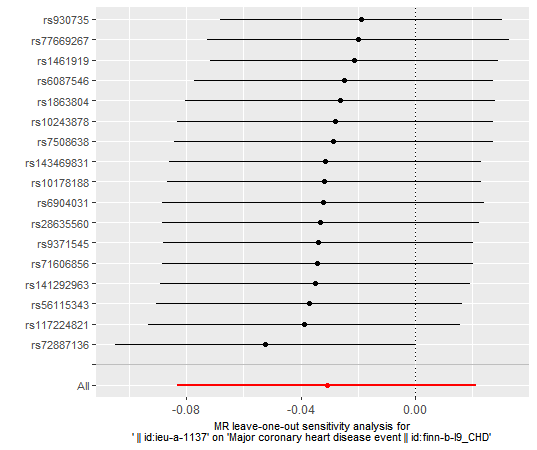
**

**Figure S27.** Scatter plot for MR examining the effect of ER- BC on CHD

**
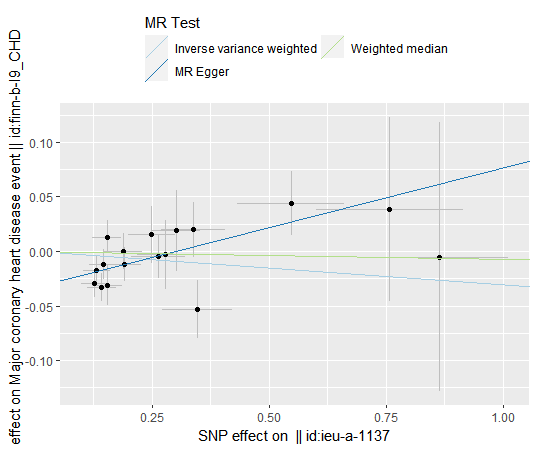
**

**Figure S28.** Funnel plot for MR examining the effect of ER- BC on CHD

**
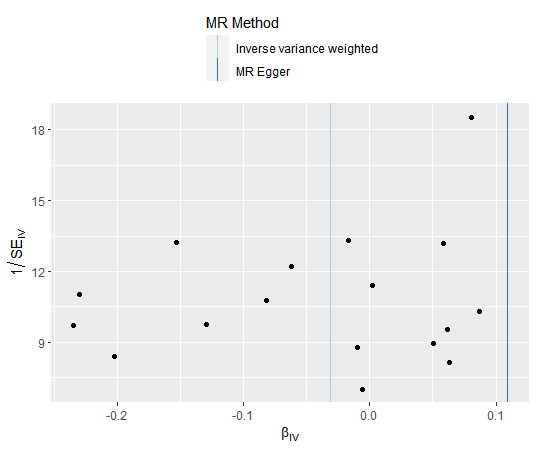
**

**Figure S29.** Leave-one-out analysis for MR examining the effect of ER- BC on HHD


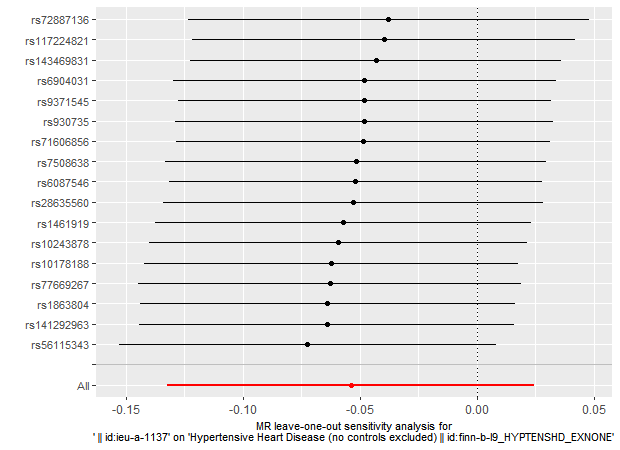


**Figure S30.** Scatter plot for MR examining the effect of ER- BC on HHD


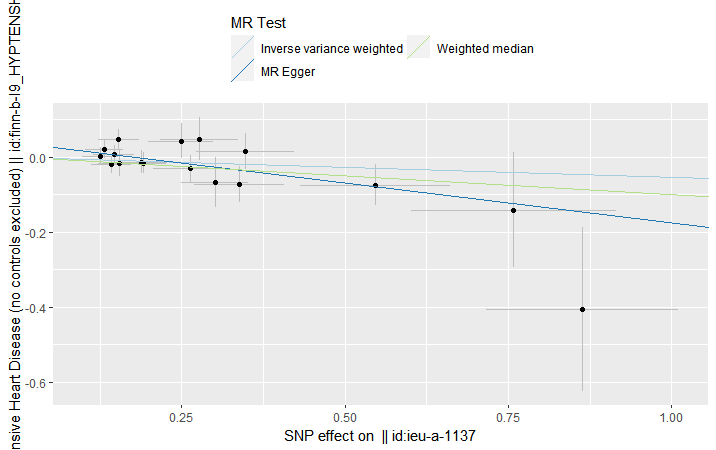


**Figure S31.** Funnel plot for MR examining the effect of ER- BC on HHD


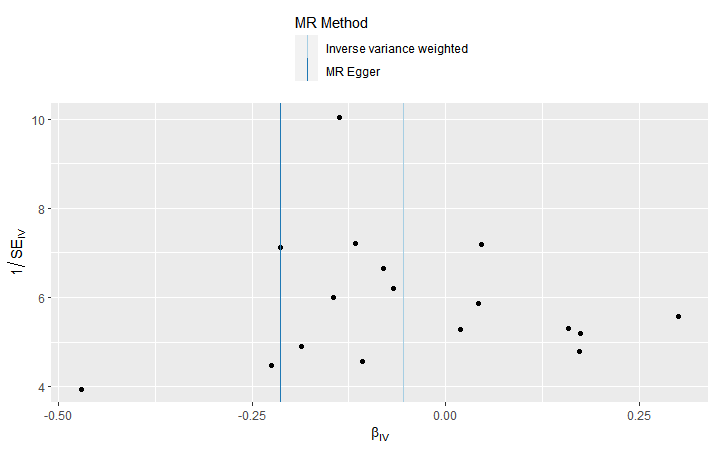


**Figure S32.** Leave-one-out analysis for MR examining the effect of ER- BC on IHD


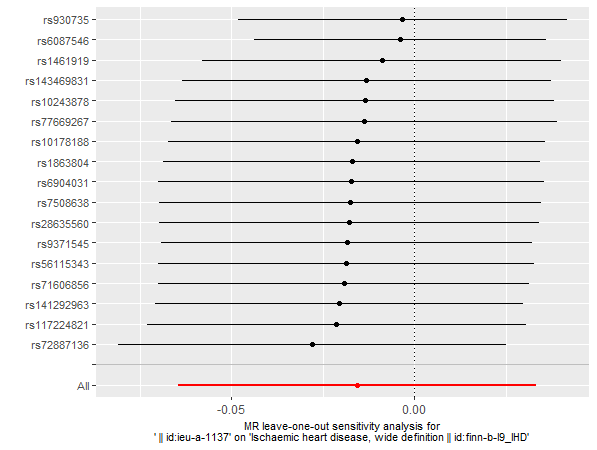


**Figure S33.** Scatter plot for MR examining the effect of ER- BC on IHD


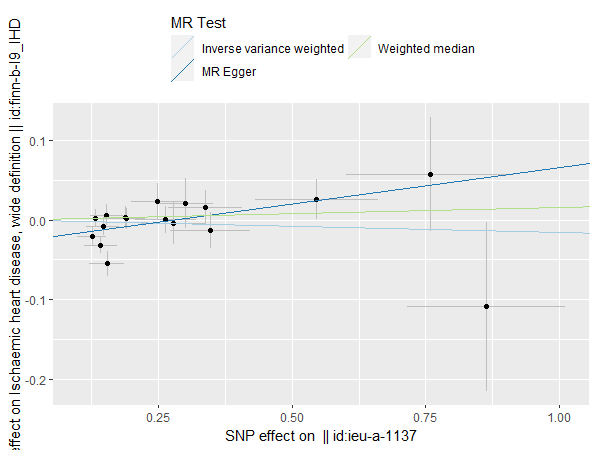


**Figure S34.** Funnel plot for MR examining the effect of ER- BC on IHD


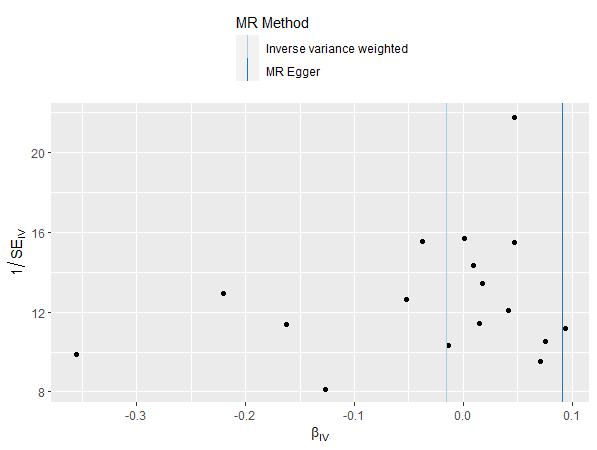


**Figure S35.** Leave-one-out analysis for MR examining the effect of ER- BC on HF


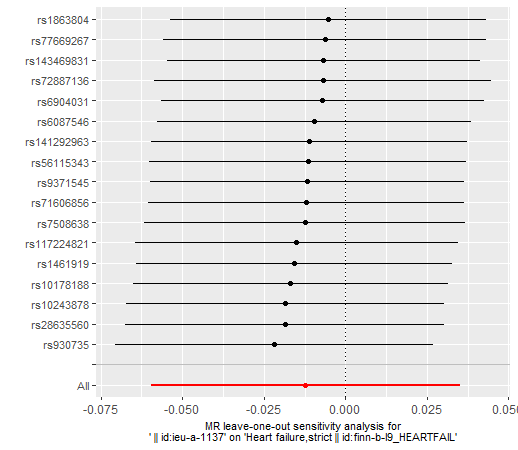


**Figure S36.** Scatter plot for MR examining the effect of ER- BC on HF


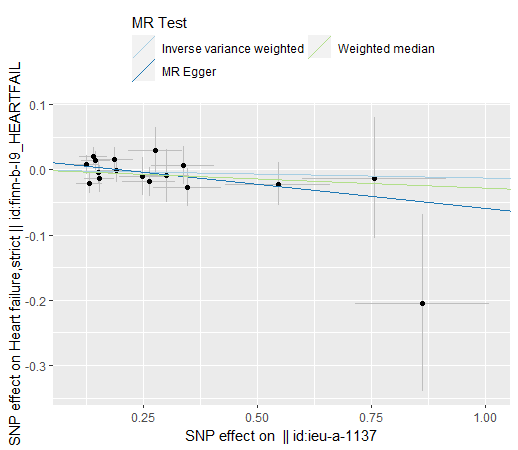


**Figure S37.** Funnel plot for MR examining the effect of ER- BC on HF


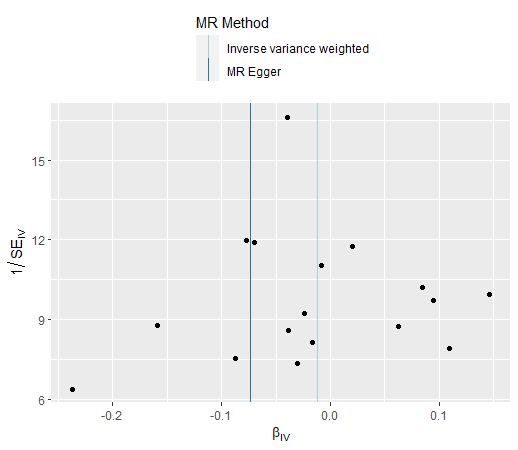


**STROBE-MR checklist**

**STROBE-MR checklist of recommended items to address in reports of Mendelian randomization studies**12

| **Item No.** | **Section** | **Checklist item** | **Page No.** | **Relevant text from manuscript** |
| --- | --- | --- | --- | --- |
| 1 | **TITLE and ABSTRACT** | Indicate Mendelian randomization (MR) as the study’s design in the title and/or the abstract if that is a main purpose of the study | 1 | Causal pathways between breast cancer and cardiovascular disease through mediator factors: a two-step mendelian randomization analysis  Methods: In this study, we conducted two-sample Mendelian randomization (MR) to ... calculate the mediated proportions. |
|  | **INTRODUCTION** |  |  |  |
| 2 | **Background** | Explain the scientific background and rationale for the reported study. What is the exposure? Is a potential causal relationship between exposure and outcome plausible? Justify why MR is a helpful method to address the study question | 2-3 | Several cohort studies have examined the CVD risks among BC survivors, which showed that women with a history of BC are more predisposed to developing and dying from CVD compared to women without a history of BC.  This methodology addresses several limitations encountered in traditional methods, including the issue of reverse causation and the potential for unmeasured confounding. |
| 3 | **Objectives** | State specific objectives clearly, including pre-specified causal hypotheses (if any). State that MR is a method that, under specific assumptions, intends to estimate causal effects | 3 | In this study, we conducted a two-step MR analyses to elucidate the causal association between BC (overall BC, ER+ BC, ER- BC) and CVD, specifically CHD, HHD, IHD and HF, with particular focus on identifying metabolic mediators and quantifying their mediation effects on this association pathway. |
|  | **METHODS** |  |  |  |
| 4 | **Study design and data sources** | Present key elements of the study design early in the article. Consider including a table listing sources of data for all phases of the study. For each data source contributing to the analysis, describe the following: |  |  |
|  | a) | Setting: Describe the study design and the underlying population, if possible. Describe the setting, locations, and relevant dates, including periods of recruitment, exposure, follow-up, and data collection, when available. | 3 | This MR study consisted of two stages and an overview of the study design is presented in Figure 1. In stage 1, ...and then implemented two-step MR to calculate the mediation effect of each selected mediator on the causal relationship between BC and CVD. |
|  | b) | Participants: Give the eligibility criteria, and the sources and methods of selection of participants. Report the sample size, and whether any power or sample size calculations were carried out prior to the main analysis | 3 | GWASs summary level data, primarily originating from individuals of European ancestry, was utilized to obtain data resources pertaining to exposures, mediators, and outcomes... Detailed information was summarized in Table 1. |
|  | c) | Describe measurement, quality control and selection of genetic variants | 3-4 | Single nucleotide polymorphisms (SNPs) with genome-wide significance (p<5×10−6) were derived from the corresponding GWASs and then clumped to a linkage disequilibrium threshold of r2<0.001 within a 5000 kb window ...by applying a threshold at genome-wide significance (p>5×10-5) |
|  | d) | For each exposure, outcome, and other relevant variables, describe methods of assessment and diagnostic criteria for diseases | NA |  |
|  | e) | Provide details of ethics committee approval and participant informed consent, if relevant | 3 | Ethical approval for the original studies was obtained, ensuring compliance with ethical standards. |
| 5 | **Assumptions** | Explicitly state the three core IV assumptions for the main analysis (relevance, independence and exclusion restriction) as well assumptions for any additional or sensitivity analysis | 5 | All MR analyses fulfilled 3 critical assumptions: (1) relevance assumption: SNPs chosen as IVs must exhibit a strong association with the exposure; (2) independence assumption: the genetic variants selected should not be correlated with potential confounders; (3) exclusion-restriction assumption: IVs influence the outcome solely through the exposure, not via alternative pathways |
| 6 | **Statistical methods: main analysis** | Describe statistical methods and statistics used |  |  |
|  | a) | Describe how quantitative variables were handled in the analyses (i.e., scale, units, model) | 3 | Detailed information was summarized in Table 1. |
|  | b) | Describe how genetic variants were handled in the analyses and, if applicable, how their weights were selected | 5 | For two-sample MR analyses, the inverse variance weighted (IVW) approach served as the primary analytical strategy, with the MR-Egger, weighted median, simple mode, and weight mode methodologies acting as supplementary methods... to aggregate Wald Ratio estimates for individual SNPs, thereby generating a single causal estimate for each exposure variable. |
|  | c) | Describe the MR estimator (e.g. two-stage least squares, Wald ratio) and related statistics. Detail the included covariates and, in case of two-sample MR, whether the same covariate set was used for adjustment in the two samples | 5 | As the primary analytical tool, we employed IVW, which leverages a random-effects meta-analysis framework to aggregate Wald Ratio estimates for individual SNPs, thereby generating a single causal estimate for each exposure variable. |
|  | d) | Explain how missing data were addressed | NA |  |
|  | e) | If applicable, indicate how multiple testing was addressed | NA |  |
| 7 | **Assessment of assumptions** | Describe any methods or prior knowledge used to assess the assumptions or justify their validity | 5 | For two-sample MR analyses, the inverse variance weighted (IVW) approach served as the primary analytical strategy, with the MR-Egger, weighted median, simple mode, and weight mode methodologies acting as supplementary methods |
| 8 | **Sensitivity analyses and additional analyses** | Describe any sensitivity analyses or additional analyses performed (e.g. comparison of effect estimates from different approaches, independent replication, bias analytic techniques, validation of instruments, simulations) | 5 | Comprehensive sensitivity analyses were conducted to estimate potential violations of the model assumptions in the MR analysis. To detect the presence of horizontal pleiotropy, we utilized the intercept test of the MR-Egger regression ...Finally, a funnel plot was implemented to assess the potential directional bias resulting from pleiotropy |
| 9 | **Software and pre-registration** |  |  |  |
|  | a) | Name statistical software and package(s), including version and settings used | 5 | All MR analyses were conducted with the R (version 4.2.3) using the package ‘TwoSampleMR’, ‘MR-PRESSO’ and ‘MendelianRandomization’. |
|  | b) | State whether the study protocol and details were pre-registered (as well as when and where) | NA |  |
|  | **RESULTS** |  |  |  |
| 10 | **Descriptive data** |  |  |  |
|  | a) | Report the numbers of individuals at each stage of included studies and reasons for exclusion. Consider use of a flow diagram | 4 | The detailed process for selecting mediators is presented in Figure 2. |
|  | b) | Report summary statistics for phenotypic exposure(s), outcome(s), and other relevant variables (e.g. means, SDs, proportions) |  |  |
|  | c) | If the data sources include meta-analyses of previous studies, provide the assessments of heterogeneity across these studies | 6 | The results of two-Sample MR are detailed in Supplementary Figure S2 and Supplementary Table S2. |
|  | d) | For two-sample MR:  i.  Provide justification of the similarity of the genetic variant-exposure associations between the exposure and outcome samples  ii.  Provide information on the number of individuals who overlap between the exposure and outcome studies | 6 | The results of two-Sample MR are detailed in Supplementary Figure S2 and Supplementary Table S2. |
| 11 | **Main results** |  |  |  |
|  | a) | Report the associations between genetic variant and exposure, and between genetic variant and outcome, preferably on an interpretable scale | 6 | Our analyses evaluated by IVW method uncovered a positive correlation between genetically predicted ER+BC and a slightly elevated risk of CHD (OR=1.034, 95%CI: 1.004-1.065, p=0.026), HHD (OR=1.061, 95%CI: 1.002-1.124, p=0.041), IHD (OR=1.034, 95%CI: 1.007-1.062, p=0.013) and HF (OR=1.055, 95%CI: 1.013-1.099, p=0.010), although MR-Egger and weighted median did not attain statistical significance. |
|  | b) | Report MR estimates of the relationship between exposure and outcome, and the measures of uncertainty from the MR analysis, on an interpretable scale, such as odds ratio or relative risk per SD difference | 6 | Our analyses evaluated by IVW method uncovered ... although MR-Egger and weighted median did not attain statistical significance. |
|  | c) | If relevant, consider translating estimates of relative risk into absolute risk for a meaningful time period | NA |  |
|  | d) | Consider plots to visualize results (e.g. forest plot, scatterplot of associations between genetic variants and outcome versus between genetic variants and exposure) | 6 | The potential risk of overall BC on four kinds of cardiovascular diseases, including CHD, HHD, IHD and HF, were evaluated as the first step of our study. Consequently, we have not obtained causal relationships with statistical significance (Figure 3). To determine whether these negative results were related to the interference with the ER status of BC, we further performed subtypes analysis based on ER status (ER+ and ER−) and the results are summarized in Figure 4. |
| 12 | **Assessment of assumptions** |  |  |  |
|  | a) | Report the assessment of the validity of the assumptions | 6 | The results of two-Sample MR are detailed in Supplementary Figure S2 and Supplementary Table S2. |
|  | b) | Report any additional statistics (e.g., assessments of heterogeneity across genetic variants, such as *I2*, Q statistic or E-value) | 6 | The results of two-Sample MR are detailed in Supplementary Figure S2 and Supplementary Table S2. |
| 13 | **Sensitivity analyses and additional analyses** |  |  |  |
|  | a) | Report any sensitivity analyses to assess the robustness of the main results to violations of the assumptions | 7 | Based on the presence of pleiotropy or not, we employed different methods. Specifically, in the absence of pleiotropy, we used the IVW method as the primary analytical approach. Conversely, when pleiotropy was present, the MR-Egger method was adopted as the primary analytical approach, with the addition of the MR-PRESSO outlier test to mitigate potential biases stemming from pleiotropic influences. |
|  | b) | Report results from other sensitivity analyses or additional analyses | 7 | The sensitivity analyses conducted within this study further reinforced the robustness and credibility of the causal estimates observed, and the outcomes are detailed in Supplementary Table S2-4 and Supplementary Figure S2. |
|  | c) | Report any assessment of direction of causal relationship (e.g., bidirectional MR) | 7 | Due to the inconsistency in the MR direction of total cholesterol and LDL-C, the final mediator that meets the screening criteria is HDL-C. |
|  | d) | When relevant, report and compare with estimates from non-MR analyses | 7 | A retrospective cohort analysis utilizing the SEER-Medicare database highlighted CVD as the primary cause of mortality among older (>66 years) survivors of early-stage or localized BC, particularly those over 75 years old |
|  | e) | Consider additional plots to visualize results (e.g., leave-one-out analyses) | 7 | The sensitivity analyses conducted within this study further reinforced the robustness and credibility of the causal estimates observed, and the outcomes are detailed in Supplementary Table S2-4 and Supplementary Figure S2. |
|  | **DISCUSSION** |  |  |  |
| 14 | **Key results** | Summarize key results with reference to study objectives | 7 | In the current MR study, we found that genetically predicted ER+ BC was associated with a slightly increased risk of cardiovascular disease in the European population, including CHD, HHD, IHD and HF. Additionally, our research has identified one mediator out of 18 metabolic traits, HDL-C, with mediated proportion of 15.2% (3.4%-27.0%) and 15.5% (3.9%-27.2%) in the association between ER+ BC and CHD, IHD respectively. |
| 15 | **Limitations** | Discuss limitations of the study, taking into account the validity of the IV assumptions, other sources of potential bias, and imprecision. Discuss both direction and magnitude of any potential bias and any efforts to address them | 9-10 | Nevertheless, our study encountered certain limitations. |
| 16 | **Interpretation** |  |  |  |
|  | a) | Meaning: Give a cautious overall interpretation of results in the context of their limitations and in comparison with other studies | 8 | Nonetheless, no MR study has verified such an association so far. To fill this gap, our Mendelian randomization analysis provides an opportunity to investigate the causal relationship between BC and the CVD incidence. This analysis is valuable in aiding the early detection and diagnosis of CVD risk factors and symptoms in BC patients. |
|  | b) | Mechanism: Discuss underlying biological mechanisms that could drive a potential causal relationship between the investigated exposure and the outcome, and whether the gene-environment equivalence assumption is reasonable. Use causal language carefully, clarifying that IV estimates may provide causal effects only under certain assumptions | 8-9 | Mechanistically, the abnormalities in blood lipids among BC survivors and their subsequent impact on CVD remain unclear. One possible explanation involves genes related to lipoprotein metabolism. Specifically, peroxisome proliferator-activated receptors (PPARs)...expression and activity of PPARs may be influenced by factors such as chemotherapy and endocrine therapy, thereby further affecting blood lipid levels and the risk of CVD. |
|  | c) | Clinical relevance: Discuss whether the results have clinical or public policy relevance, and to what extent they inform effect sizes of possible interventions | 9 | Considering the mediation effect of HDL-C between ER+ BC and CVD, HDL-C can be clinically used for early screening and predicting the occurrence of CVD in BC survivors. |
| 17 | **Generalizability** | Discuss the generalizability of the study results (a) to other populations, (b) across other exposure periods/timings, and (c) across other levels of exposure | 10 | Therefore, to ensure consistency in genetic background, this MR study was almost exclusively restricted to individuals of European ancestry, thus the generalization of our findings to other ethnic groups should be approached with caution. |
|  | **OTHER INFORMATION** |  |  |  |
| 18 | **Funding** | Describe sources of funding and the role of funders in the present study and, if applicable, sources of funding for the databases and original study or studies on which the present study is based | 10 | This work was supported by the National Natural Science Foundation of China (82073308, and 82373105), China Postdoctoral Science Foundation(2023M741796), the High-level Startup Fund of Nanjing Medical University (KY109RC2019010), and the Cancer Fundamental Project from Bethune Charitable Foundation (BCF-NH-ZL-20201119 -004). |
| 19 | **Data and data sharing** | Provide the data used to perform all analyses or report where and how the data can be accessed, and reference these sources in the article. Provide the statistical code needed to reproduce the results in the article, or report whether the code is publicly accessible and if so, where | 10 | The datasets presented in this study can be found in online repositories. The names of the repository/repositories and accession number(s) can be found in the article/ Supplementary Material. |
| 20 | **Conflicts of Interest** | All authors should declare all potential conflicts of interest | 11 | The authors assert that this research was conducted without any commercial or financial ties that might be perceived as a potential conflict of interest. |

This checklist is copyrighted by the Equator Network under the Creative Commons Attribution 3.0 Unported (CC BY 3.0) license.

1. Skrivankova VW, Richmond RC, Woolf BAR, Yarmolinsky J, Davies NM, Swanson SA, et al. Strengthening the Reporting of Observational Studies in Epidemiology using Mendelian Randomization (STROBE-MR) Statement. JAMA. 2021;under review.

2. Skrivankova VW, Richmond RC, Woolf BAR, Davies NM, Swanson SA, VanderWeele TJ, et al. Strengthening the Reporting of Observational Studies in Epidemiology using Mendelian Randomisation (STROBE-MR): Explanation and Elaboration. BMJ. 2021;375:n2233.
